# Supplementary material for: Binding enabled catalytic activation of SO2 by copper koneramine complexes under ambient conditions
Source: Royal Society of Chemistry journal article supplement (doi:10.1039/c9gc02647a), 2019-01-01
Supplement: c9gc02647a1.pdf [file c9gc02647a1.pdf]

## Supporting information

# Binding Enabled Catalytic Activation of SO<sub>2</sub> by Copper Koneramine Complexes at Ambient Conditions

*Manoj Chahal,<sup>†</sup> Sakthi Raje<sup>\*,†</sup> Gopichand Kotana<sup>†</sup> and Raja Angamuthu<sup>\*,†</sup>*

<sup>†</sup>Laboratory of Inorganic Synthesis and Bioinspired Catalysis (LISBIC), Department of  
Chemistry, Indian Institute of Technology Kanpur, Kanpur 208016, India.

## Table of content

|                                                                                                                                                                                                                                           |    |
|-------------------------------------------------------------------------------------------------------------------------------------------------------------------------------------------------------------------------------------------|----|
| Figure S 1. ESI-MS of [Cu(L-OMe)Cl <sub>2</sub> ]                                                                                                                                                                                         | 11 |
| Figure S 2. Simulated ESI-MS of [Cu(L-OMe)Cl] <sup>+</sup> cation                                                                                                                                                                         | 12 |
| Figure S 3. ORTEP of <i>syn</i> -[Cu(L-OMe)Cl <sub>2</sub> ] drawn at 50% probability level                                                                                                                                               | 13 |
| Figure S 4. ESI-MS of the solution containing [Cu(L-OMe)Cl <sub>2</sub> ] and 2 equivalent ferrocene after purging SO <sub>2</sub> (Positive ion mode) in CH <sub>3</sub> CN                                                              | 14 |
| Figure S 5. ESI-MS of the solution containing [Cu(L-OMe)Cl <sub>2</sub> ] and 2 equivalent ferrocene after purging SO <sub>2</sub> (Negative ion mode) in CH <sub>3</sub> CN                                                              | 15 |
| Figure S 6. Simulated ESI-MS for HSO <sub>4</sub> <sup>-</sup> anion                                                                                                                                                                      | 16 |
| Figure S 7. ESI-MS of the solution containing anhydrous CuCl <sub>2</sub> and 2 equivalent ferrocene after purging SO <sub>2</sub> (Negative ion mode) showing no formation of SO <sub>2</sub> activated products                         | 17 |
| Figure S 8. ESI-MS of the ferrocene solution after purging SO <sub>2</sub> (Negative ion mode) showing no formation of SO <sub>2</sub> activated products                                                                                 | 18 |
| Figure S 9. ESI-MS of the solution containing [Cu(L-OMe)Cl <sub>2</sub> ] and 2 equivalent ferrocene after purging SO <sub>2</sub> (Positive ion mode) in CH <sub>3</sub> CN after 3 days showing no peaks for [Cu(L-OMe)Cl] <sup>+</sup> | 19 |
| Figure S 10. ESI-MS of the solution containing [Cu(L-OMe)Cl <sub>2</sub> ] and 2 equivalent ferrocene after purging SO <sub>2</sub> (Negative ion mode) in CH <sub>3</sub> CN after 3 days                                                | 20 |
| Figure S 11. ESI-MS of [Cu(Tim-H)(H <sub>2</sub> O)Cl <sub>2</sub> ](OTf)                                                                                                                                                                 | 21 |
| Figure S 12. Simulated ESI-MS of [Cu(Tim-H)(H <sub>2</sub> O)Cl <sub>2</sub> ](OTf) for [Cu(Tim)Cl] <sup>+</sup>                                                                                                                          | 22 |
| Figure S 13. ORTEP of [Cu(Tim-H)(H <sub>2</sub> O)Cl <sub>2</sub> ](OTf) drawn at 50% probability level                                                                                                                                   | 23 |
| Figure S 14. One-dimensional hydrogen-bonded chain of [Cu(Tim-H)(H <sub>2</sub> O)Cl <sub>2</sub> ](OTf)                                                                                                                                  | 24 |
| Figure S 15. <sup>1</sup> H NMR of <i>N</i> <sup>2</sup> , <i>N</i> <sup>4</sup> -diisopropyl- <i>N</i> <sup>6</sup> -(2-((pyridin-2-ylmethyl)amino)ethyl)-1,3,5-triazine-2,4,6-triamine in CDCl <sub>3</sub>                             | 25 |
| Figure S 16. <sup>13</sup> C NMR of <i>N</i> <sup>2</sup> , <i>N</i> <sup>4</sup> -diisopropyl- <i>N</i> <sup>6</sup> -(2-((pyridin-2-ylmethyl)amino)ethyl)-1,3,5-triazine-2,4,6-triamine in CDCl <sub>3</sub>                            | 26 |
| Figure S 17. <sup>1</sup> H NMR of [L-H] in CDCl <sub>3</sub>                                                                                                                                                                             | 27 |
| Figure S 18. <sup>13</sup> C NMR of [L-H] in CDCl <sub>3</sub>                                                                                                                                                                            | 28 |
| Figure S 19. ESI-MS of [L-H]                                                                                                                                                                                                              | 29 |
| Figure S 20. Simulated ESI-MS of [L-H] for [(L-H)+H]                                                                                                                                                                                      | 30 |
| Figure S 21. ORTEP of [L-H] drawn at 50% probability level                                                                                                                                                                                | 31 |

|                                                                                                                                                                                                        |    |
|--------------------------------------------------------------------------------------------------------------------------------------------------------------------------------------------------------|----|
| Figure S 22. ESI-MS of $[\text{Cu}(\text{L-H})\text{Cl}_2]$ .....                                                                                                                                      | 32 |
| Figure S 23. Simulated ESI-MS of $[\text{Cu}(\text{L-H})\text{Cl}_2]$ for $[\text{Cu}(\text{L-H})\text{Cl}]^+$ .....                                                                                   | 33 |
| Figure S 24. ORTEP of $[\text{Cu}(\text{L-H})\text{Cl}_2]$ drawn at 50% probability level.....                                                                                                         | 34 |
| Figure S 25. ESI-MS of $[\text{Cu}(\text{L-H})(\text{H}^+)(\text{OTf})(\text{Cl})](\text{OTf})$ .....                                                                                                  | 35 |
| Figure S 26. Simulated ESI-MS of $[\text{Cu}(\text{L-H})(\text{H}^+)(\text{OTf})(\text{Cl})](\text{OTf})$ for $[\text{Cu}(\text{L-H})\text{Cl}+\text{CF}_3\text{SO}_3\text{H}]^+$ .....                | 36 |
| Figure S 27. Simulated ESI-MS of $[\text{Cu}((\text{L-H})(\text{H}^+)(\text{OTf})\text{Cl})](\text{OTf})$ for $[\text{Cu}(\text{L-H})(\text{CF}_3\text{SO}_3)+\text{CF}_3\text{SO}_3\text{H}]^+$ ..... | 37 |
| Figure S 28. ORTEP of $[\text{Cu}(\text{L-H})(\text{H}^+)(\text{OTf})\text{Cl}](\text{OTf})$ drawn at 50% probability level .....                                                                      | 38 |
| Figure S 29. ESI-MS of the solution containing $[\text{Cu}(\text{L-H})\text{Cl}_2]$ and 2 equivalent ferrocene after purging $\text{SO}_2$ (Positive ion mode) in $\text{CH}_3\text{CN}$ .....         | 39 |
| Figure S 30. ESI-MS of the solution containing $[\text{Cu}(\text{L-H})\text{Cl}_2]$ and 2 equivalent ferrocene after purging $\text{SO}_2$ (Negative ion mode) in $\text{CH}_3\text{CN}$ .....         | 40 |
| Figure S 31. ESI-MS of the solution containing $[\text{Cu}(\text{L-H})\text{Cl}_2]$ and 51 equivalent ferrocene after purging $\text{SO}_2$ (Positive ion mode) in $\text{CH}_3\text{CN}$ .....        | 41 |
| Figure S 32. ESI-MS of the solution containing $[\text{Cu}(\text{L-H})\text{Cl}_2]$ and 51 equivalent ferrocene after purging $\text{SO}_2$ (Negative ion mode) in $\text{CH}_3\text{CN}$ .....        | 43 |
| Figure S 33. ESI-MS of the solution containing $[\text{L-H}]$ and 2 equivalent ferrocene after purging $\text{SO}_2$ (Positive ion mode) in $\text{CH}_3\text{CN}$ .....                               | 45 |
| Figure S 34. ESI-MS of the solution containing $[\text{L-H}]$ and 2 equivalent ferrocene after purging $\text{SO}_2$ (Negative ion mode) in $\text{CH}_3\text{CN}$ .....                               | 46 |
| Figure S 35. UV-Vis of ferrocene in acetonitrile and in $\text{SO}_2$ -purged acetonitrile.....                                                                                                        | 47 |
| Figure S 36. CV of $[\text{Cu}(\text{L-H})\text{Cl}_2]$ in acetonitrile.....                                                                                                                           | 48 |
| Table S 1. Crystal data for $[\text{Cu}(\text{L-OMe})\text{Cl}_2]$ .....                                                                                                                               | 49 |
| Table S 2. Crystal data for $[\text{Cu}(\text{Tim-H})(\text{H}_2\text{O})\text{Cl}_2](\text{OTf})$ .....                                                                                               | 50 |
| Table S 3. Crystal data for $[\text{L-H}]$ .....                                                                                                                                                       | 51 |
| Table S 4. Crystal data for $[\text{Cu}(\text{L-H})\text{Cl}_2]$ .....                                                                                                                                 | 52 |
| Table S 5. Crystal data for $[\text{Cu}(\text{L-H})(\text{H}^+)(\text{OTf})\text{Cl}](\text{OTf})$ .....                                                                                               | 53 |

### The reaction of [Cu(L-OMe)Cl<sub>2</sub>] and 2 equivalent ferrocene with SO<sub>2</sub> in CH<sub>3</sub>CN

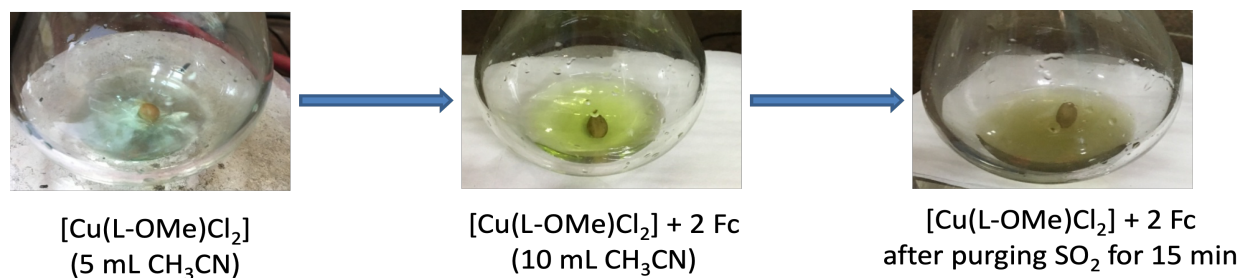

[Cu(L-OMe)Cl<sub>2</sub>] (50 mg, 0.083 mmol) was dried under vacuum for 30 minutes in Schlenk flask and dissolved with 5 mL CH<sub>3</sub>CN under N<sub>2</sub> atmosphere resulted in a light blue-green solution. It was stirred for 5 minutes and the yellow solution of ferrocene (31 mg, 0.166 mmol) in 5 mL CH<sub>3</sub>CN was added at room temperature. The light blue-green solution changed to lime green upon addition of ferrocene solution. The lime green solution was stirred for 5 minutes then SO<sub>2</sub> was purged for 15 minutes at room temperature along with the stirring. The clear lime green solution turned to olive green within 10 minutes of SO<sub>2</sub> purging with little turbidity then the solution was left in open air and sample was analysed by high-resolution ESI-MS.

#### High resolution ESI-MS (cation mode):

$m/z$  for C<sub>10</sub>H<sub>10</sub>Fe = 186.0159 (calcd. 186.0132) = Fc<sup>+</sup>

$m/z$  for C<sub>11</sub>H<sub>24</sub>N<sub>7</sub> = 254.2113 (calcd. 254.2093) = [N<sup>2</sup>-(2-aminoethyl)-N<sup>4</sup>,N<sup>6</sup>-diisopropyl-1,3,5-triazine-2,4,6-triamine + H]

$m/z$  for C<sub>17</sub>H<sub>27</sub>N<sub>8</sub> = 343.2369 (calcd. 343.2359) = Tim-H

$m/z$  for C<sub>17</sub>H<sub>26</sub>N<sub>8</sub>CuCl = 440.1289 (calcd. 440.1265) = [Cu(Tim)Cl]<sup>+</sup>

$m/z$  for C<sub>24</sub>H<sub>33</sub>N<sub>9</sub>OCuCl = 561.1796 (calcd. 561.1793) = [Cu(L-OMe)Cl]<sup>+</sup>

#### High resolution ESI-MS (anion mode):

$m/z$  for HSO<sub>4</sub> = 96.9595 (calcd. 96.9596) = bisulfate anion



**Control reactions:****anhydrous  $\text{CuCl}_2 + 2\text{Fc} + \text{SO}_2 + \text{O}_2 \longrightarrow$  No activation**

anhydrous  $\text{CuCl}_2$  (14 mg, 0.104 mmol) was dried under vacuum for 30 minutes in Schlenk flask and added to the stirred 10 mL  $\text{CH}_3\text{CN}$  yellow solution of ferrocene (31 mg, 0.166 mmol) at room temperature. The yellow-brown solution changed to green-brown upon addition of metal salt. The green-brown solution was stirred for 5 minutes then  $\text{SO}_2$  was purged for 15 minutes at room temperature along with the stirring. The color of the solution changed to red from green-brown on  $\text{SO}_2$  purging. The solution was left in open air and sample was analysed by high-resolution ESI-MS. No bisulfate peak was observed in negative ion mode.

 **$\text{Fc} + \text{SO}_2 + \text{O}_2 \longrightarrow$  No activation**

Ferrocene (15 mg, 0.08 mmol) was dried under vacuum for 30 minutes in Schlenk flask and then dissolved in 10 mL  $\text{CH}_3\text{CN}$ .  $\text{SO}_2$  was purged in yellow solution of ferrocene at room temperature along with the stirring. No change in yellow color of the solution upon  $\text{SO}_2$  purging. The solution was left in open air and sample was analysed by high-resolution ESI-MS. No bisulfate peak was observed in negative ion mode.

### **The reaction of [Cu(L-OMe)Cl<sub>2</sub>] and 2 equivalent ferrocene with SO<sub>2</sub> in CH<sub>3</sub>CN for 3 days**

[Cu(L-OMe)Cl<sub>2</sub>] (10 mg, 0.016 mmol) was dried under vacuum for 30 minutes in Schlenk flask and dissolved with 5 mL CH<sub>3</sub>CN under N<sub>2</sub> atmosphere resulted in a light blue-green solution. It was stirred for 5 minutes and the yellow solution of ferrocene (6 mg, 0.032 mmol) in 5 mL CH<sub>3</sub>CN was added at room temperature. The light blue-green solution changed to lime green upon addition of ferrocene solution. The lime green solution was stirred for 5 minutes then SO<sub>2</sub> was purged for 15 minutes at room temperature along with the stirring. The clear lime green solution turned to olive green within 10 minutes of SO<sub>2</sub> purging with little turbidity, and then the Schlenk flask was left at -20 °C for 72 h. The turbid reaction mixture was filtered through the cannula and the filtrate was analysed by high-resolution ESI-MS.

#### **High resolution ESI-MS (cation mode):**

$m/z$  for C<sub>10</sub>H<sub>10</sub>Fe = 186.0125 (calcd. 186.0131) = Fc<sup>+</sup>

$m/z$  for C<sub>11</sub>H<sub>24</sub>N<sub>7</sub> = 254.2100 (calcd. 254.2093) = [*N*<sup>2</sup>-(2-aminoethyl)-*N*<sup>4</sup>,*N*<sup>6</sup>-diisopropyl-1,3,5-triazine-2,4,6-triamine + H]

$m/z$  for C<sub>17</sub>H<sub>27</sub>N<sub>8</sub> = 343.2379 (calcd. 343.2359) = Tim-H

#### **High resolution ESI-MS (anion mode):**

$m/z$  for HSO<sub>4</sub> = 96.9589 (calcd. 96.9596) = bisulfate anion

$m/z$  for 2HSO<sub>4</sub> + H = 194.9268 (calcd. 194.9269) = [H(HSO<sub>4</sub>)<sub>2</sub>]<sup>-</sup>

**No peak was observed for [Cu(L-OMe)Cl]<sup>+</sup>**

### The reaction of [Cu(L-H)Cl<sub>2</sub>] and 2 equivalent ferrocene with SO<sub>2</sub> in CH<sub>3</sub>CN

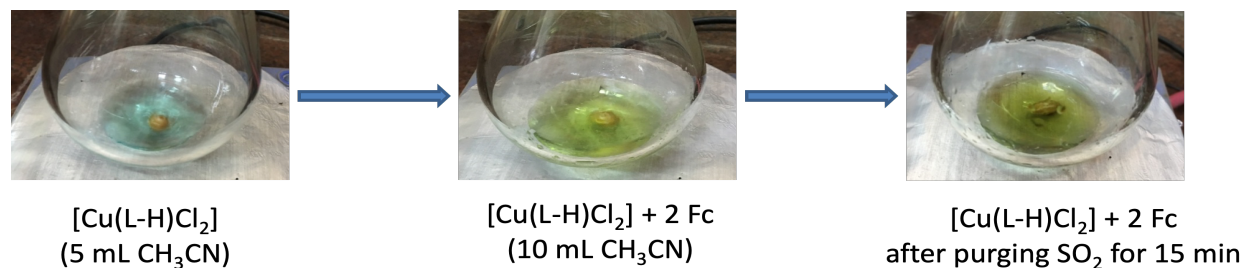

[Cu(L-H)Cl<sub>2</sub>] (9 mg, 0.016 mmol) was dried under vacuum for 30 minutes in Schlenk flask and dissolved with 5 mL CH<sub>3</sub>CN under N<sub>2</sub> atmosphere resulted in a light blue-green solution. It was stirred for 5 minutes and the yellow solution of ferrocene (6 mg, 0.032 mmol) in 5 mL CH<sub>3</sub>CN was added at room temperature. The light blue-green solution changed to lime green upon the addition of ferrocene solution. The lime green solution was stirred for 5 minutes, and SO<sub>2</sub> was purged for 15 minutes at room temperature along with the stirring. The lime green solution turned olive green upon SO<sub>2</sub> purging then, the Schlenk flask was left at -20 °C for 70 h. The solution was analysed by high-resolution ESI-MS and evaporated under reduced pressure resulted in green solid. Weight of green solid = 18 mg.

#### High resolution ESI-MS (cation mode):

$$m/z \text{ for } C_{10}H_{10}Fe = 186.0134 \text{ (calcd. } 186.0131) = Fc^+$$

$$m/z \text{ for } (C_{23}H_{31}N_9Cu)/2 = 248.0979 \text{ (calcd. } 248.0999) = [Cu(L-H)]^{2+}$$

$$m/z \text{ for } (C_{23}H_{32}N_9CuCl)/2 = 266.0861 \text{ (calcd. } 266.0882) = [Cu(L-H)+HCl]^{2+}$$

$$m/z \text{ for } C_{23}H_{31}N_9CuCl = 531.1683 \text{ (calcd. } 531.1687) = [Cu(L-H)Cl]^+$$

$$m/z \text{ for } C_{24}H_{32}N_9O_2Cu = 541.1991 \text{ (calcd. } 541.1975) = [Cu(L-H)HCOO]^+$$

$$m/z \text{ for } C_{23}H_{32}N_9O_4SCu = 593.1595 \text{ (calcd. } 593.1594) = [Cu(L-H)HSO_4]^+$$

#### High resolution ESI-MS (anion mode):

$$m/z \text{ for } HSO_4 = 96.9606 \text{ (calcd. } 96.9596) = \text{bisulfate anion}$$

$$m/z \text{ for } 2HSO_4 + H = 194.9272 \text{ (calcd. } 194.9269) = [H(HSO_4)_2]^-$$

### The reaction of $[\text{Cu}(\text{L-H})\text{Cl}_2]$ and 51 equivalent ferrocene with $\text{SO}_2$ in $\text{CH}_3\text{CN}$

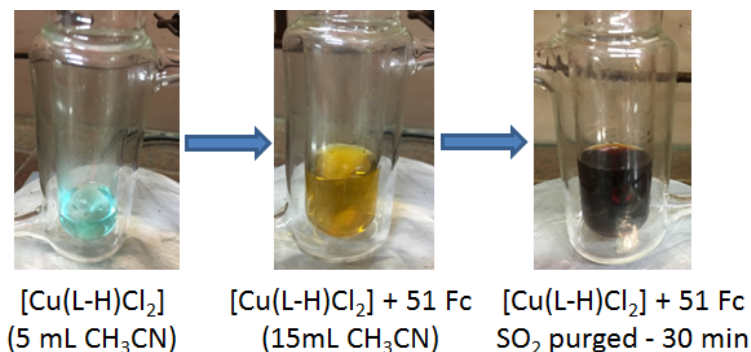

$[\text{Cu}(\text{L-H})\text{Cl}_2]$  (9 mg, 0.016 mmol) was dried under vacuum for 30 minutes in Schlenk tube and dissolved with 5 mL  $\text{CH}_3\text{CN}$  under  $\text{N}_2$  atmosphere resulted in a blue-green solution. It was stirred for 5 minutes and the yellow solution of ferrocene (153 mg, 0.82 mmol) in 10 mL  $\text{CH}_3\text{CN}$  was added at room temperature. The blue-green solution changed to yellow upon the addition of ferrocene. The yellow solution was stirred for 5 minutes, and  $\text{SO}_2$  was purged for 30 minutes at room temperature along with the stirring. The yellow solution changed to wine red upon purging  $\text{SO}_2$  within 2 minutes. The solution was transferred to 50 mL round bottom flask and evaporated to dryness under reduced pressure resulted in yellow-green solid.

The weight of the yellow-green solid = 180 mg.

#### High resolution ESI-MS (cation mode):

$m/z$  for  $\text{C}_{10}\text{H}_{10}\text{Fe} = 186.0169$  (calcd. 186.0131) =  $\text{Fc}^+$

$m/z$  for  $(\text{C}_{23}\text{H}_{31}\text{N}_9\text{Cu})/2 = 248.0989$  (calcd. 248.0999) =  $[\text{Cu}(\text{L-H})]^{2+}$

$m/z$  for  $(\text{C}_{23}\text{H}_{32}\text{N}_9\text{CuCl})/2 = 266.0851$  (calcd. 266.0882) =  $[\text{Cu}(\text{L-H})+\text{HCl}]^{2+}$

$m/z$  for  $\text{C}_{23}\text{H}_{32}\text{N}_9 = 434.2739$  (calcd. 434.2781) =  $[(\text{L-H})+\text{H}]$

$m/z$  for  $\text{C}_{23}\text{H}_{31}\text{N}_9\text{CuCl} = 531.1682$  (calcd. 531.1687) =  $[\text{Cu}(\text{L-H})\text{Cl}]^+$

$m/z$  for  $\text{C}_{24}\text{H}_{32}\text{N}_9\text{O}_2\text{Cu} = 541.2021$  (calcd. 541.1975) =  $[\text{Cu}(\text{L-H})\text{HCOO}]^+$

#### High resolution ESI-MS (anion mode):

$m/z$  for  $\text{HSO}_4 = 96.9580$  (calcd 96.9596) = bisulfate anion

$m/z$  for  $2\text{HSO}_4 + \text{H} = 194.9250$  (calcd 194.9269) =  $[\text{H}(\text{HSO}_4)_2]^-$

**Calculation for the conversion of SO<sub>2</sub> to sulfate (SO<sub>4</sub><sup>2-</sup>):**

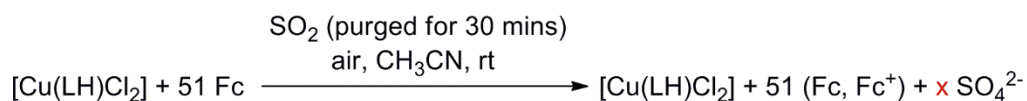

1 equiv. of [Cu(L-H)Cl<sub>2</sub>] = 0.016 mmol (9 mg)

51 equiv. of ferrocene = 0.82 mmol (153 mg)

The experimental weight of the reaction mixture after purging SO<sub>2</sub> = 180 mg

The weight of sulfate (SO<sub>4</sub><sup>2-</sup>) = (the exp. weight of the reaction mixture after purging SO<sub>2</sub>) - (the weight of copper complex and ferrocene) = (180 – 162) mg = 18 mg

The moles of sulfate (SO<sub>4</sub><sup>2-</sup>) formed from the reaction mixture = the weight of sulfate / the molecular weight of sulfate = 18 mg / 96.0626 g/mol = 0.19 mmol

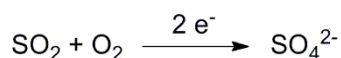

Based on the above reaction, 0.19 mmol of SO<sub>2</sub> was converted to sulfate (SO<sub>4</sub><sup>2-</sup>)

The number of equiv. of SO<sub>2</sub> converted to sulfate (SO<sub>4</sub><sup>2-</sup>) = the moles of SO<sub>2</sub> reacted / the moles of [Cu(L-H)Cl<sub>2</sub>] = 0.19 mmol / 0.016 mmol = **11.8 equivalents**

**Therefore, 11.8 equivalents of SO<sub>2</sub> was converted to sulfate (SO<sub>4</sub><sup>2-</sup>) for a equivalent of [Cu(L-H)Cl<sub>2</sub>] and 51 equivalent of ferrocene.**

### The reaction of [L-H] and 2 equivalent ferrocene with SO<sub>2</sub> in CH<sub>3</sub>CN

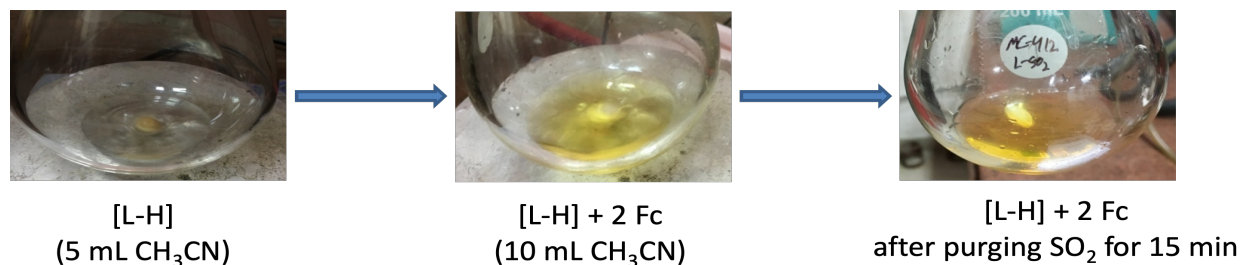

[L-H] (7 mg, 0.016 mmol) was dried under vacuum for 30 minutes in Schlenk flask and dissolved with 5 mL CH<sub>3</sub>CN under N<sub>2</sub> atmosphere. The colourless solution was stirred for 5 minutes and the yellow solution of ferrocene (6 mg, 0.032 mmol) in 5 mL CH<sub>3</sub>CN was added at room temperature. The colourless solution changed to light yellow upon the addition of ferrocene solution. The solution was stirred for 5 minutes then SO<sub>2</sub> was purged for 15 minutes at room temperature along with the stirring. The light yellow solution turned deep yellow upon SO<sub>2</sub> purging, and then, the Schlenk flask was left at -20 °C for 70 h. The yellow solution was analysed by high-resolution ESI-MS. It was evaporated under reduced pressure resulted in yellow solid.

#### High resolution ESI-MS (cation mode):

$m/z$  for (C<sub>17</sub>H<sub>30</sub>N<sub>8</sub>)/2 = 173.1266 (calcd. 173.1296) = [N<sup>2</sup>,N<sup>4</sup>-diisopropyl-N<sup>6</sup>-(2-((pyridin-2-ylmethyl)amino)ethyl)-1,3,5-triazine-2,4,6-triamine + 2H]

$m/z$  for C<sub>10</sub>H<sub>10</sub>Fe = 186.0118 (calcd. 186.0131) = Fc<sup>+</sup>

$m/z$  for C<sub>17</sub>H<sub>29</sub>N<sub>8</sub> = 345.2511 (calcd. 345.2515) = [N<sup>2</sup>,N<sup>4</sup>-diisopropyl-N<sup>6</sup>-(2-((pyridin-2-ylmethyl)amino)ethyl)-1,3,5-triazine-2,4,6-triamine + H]

#### High resolution ESI-MS (anion mode):

$m/z$  for HSO<sub>4</sub> = 96.9598 (calcd. 96.9596) = bisulfate anion

$m/z$  for 2HSO<sub>4</sub> + H = 194.9277 (calcd. 194.9269) = [H(HSO<sub>4</sub>)<sub>2</sub>]<sup>-</sup>

Figure S 1. ESI-MS of [Cu(L-OMe)Cl<sub>2</sub>].

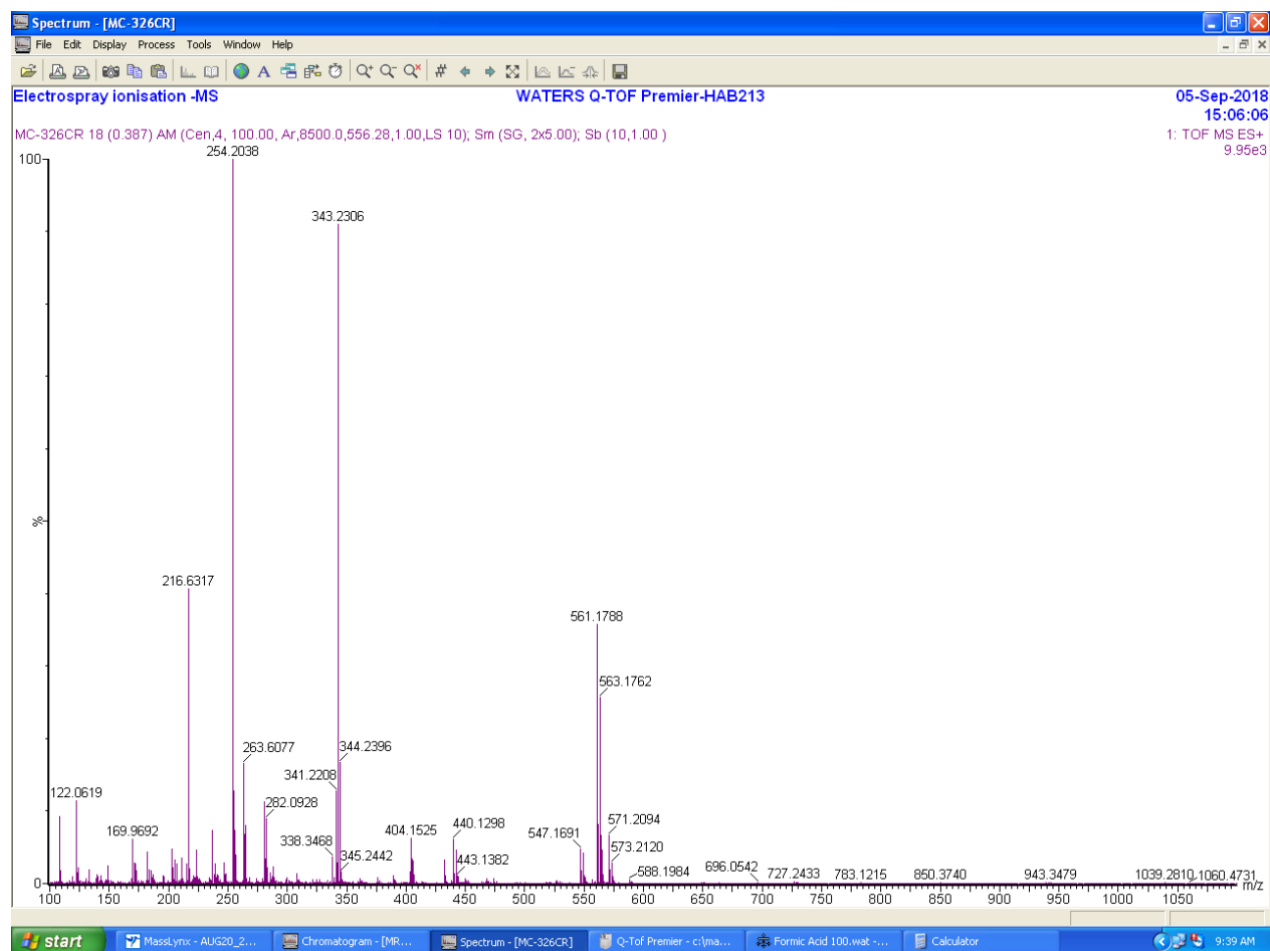

| Observed envelope | Observed for                                                                        | Calculated $m/z$ |
|-------------------|-------------------------------------------------------------------------------------|------------------|
| 254.2038          | 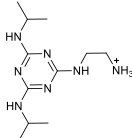 | 254.2093         |
| 343.2306          | Imd-H                                                                               | 343.2359         |
| 561.1788          | [Cu(L-OMe)Cl] <sup>+</sup>                                                          | 561.1793         |
| 571.2094          | [Cu(L-OMe)HCOO] <sup>+</sup>                                                        | 571.2081         |

Figure S 2. Simulated ESI-MS of  $[\text{Cu}(\text{L-OMe})\text{Cl}]^+$  cation.

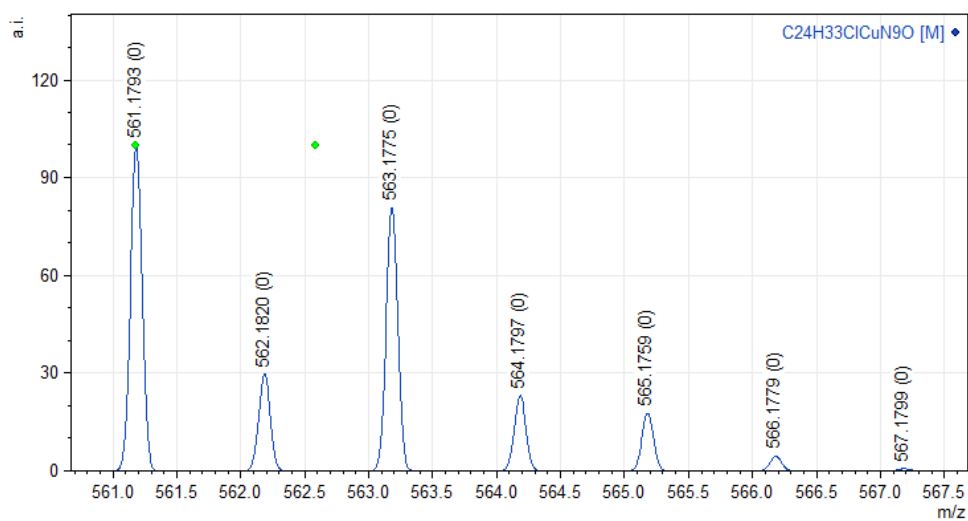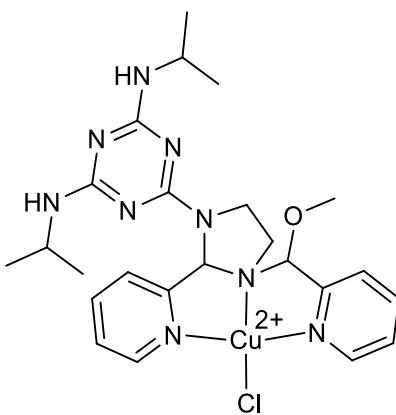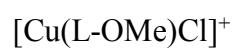



Figure S 3. ORTEP of *syn*-[Cu(L-OMe)Cl<sub>2</sub>] drawn at 50% probability level.

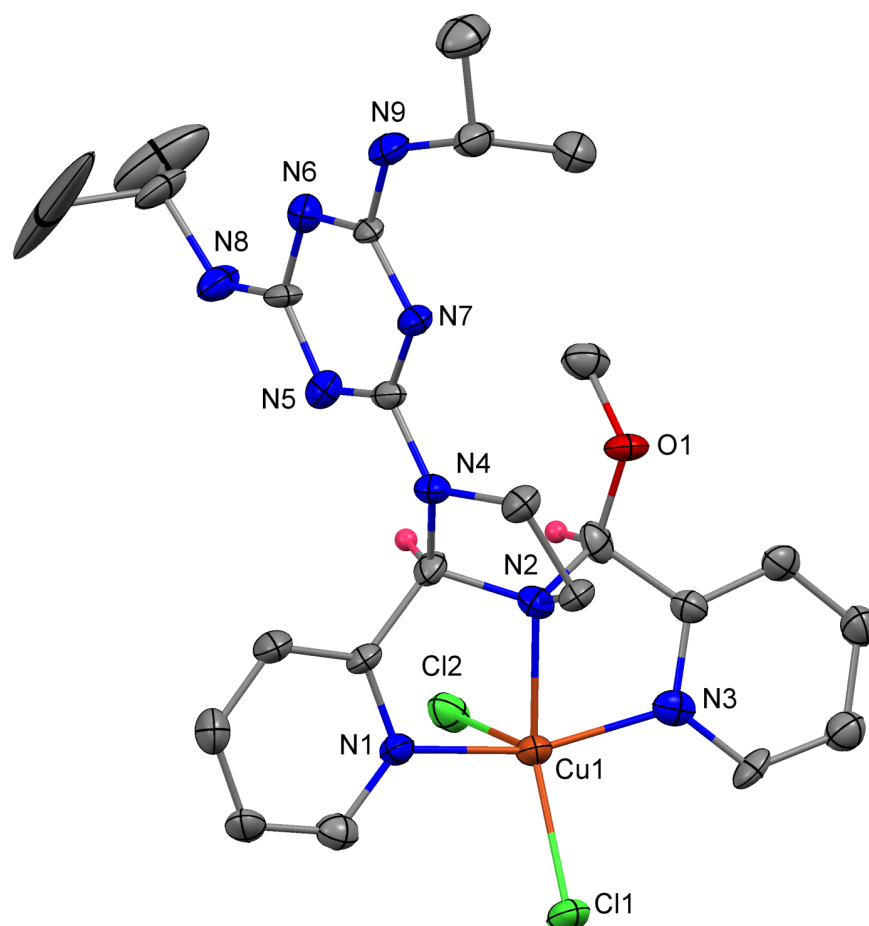

Figure S 4. ESI-MS of the solution containing  $[\text{Cu}(\text{L-OMe})\text{Cl}_2]$  and 2 equivalent ferrocene after purging  $\text{SO}_2$  (Positive ion mode) in  $\text{CH}_3\text{CN}$

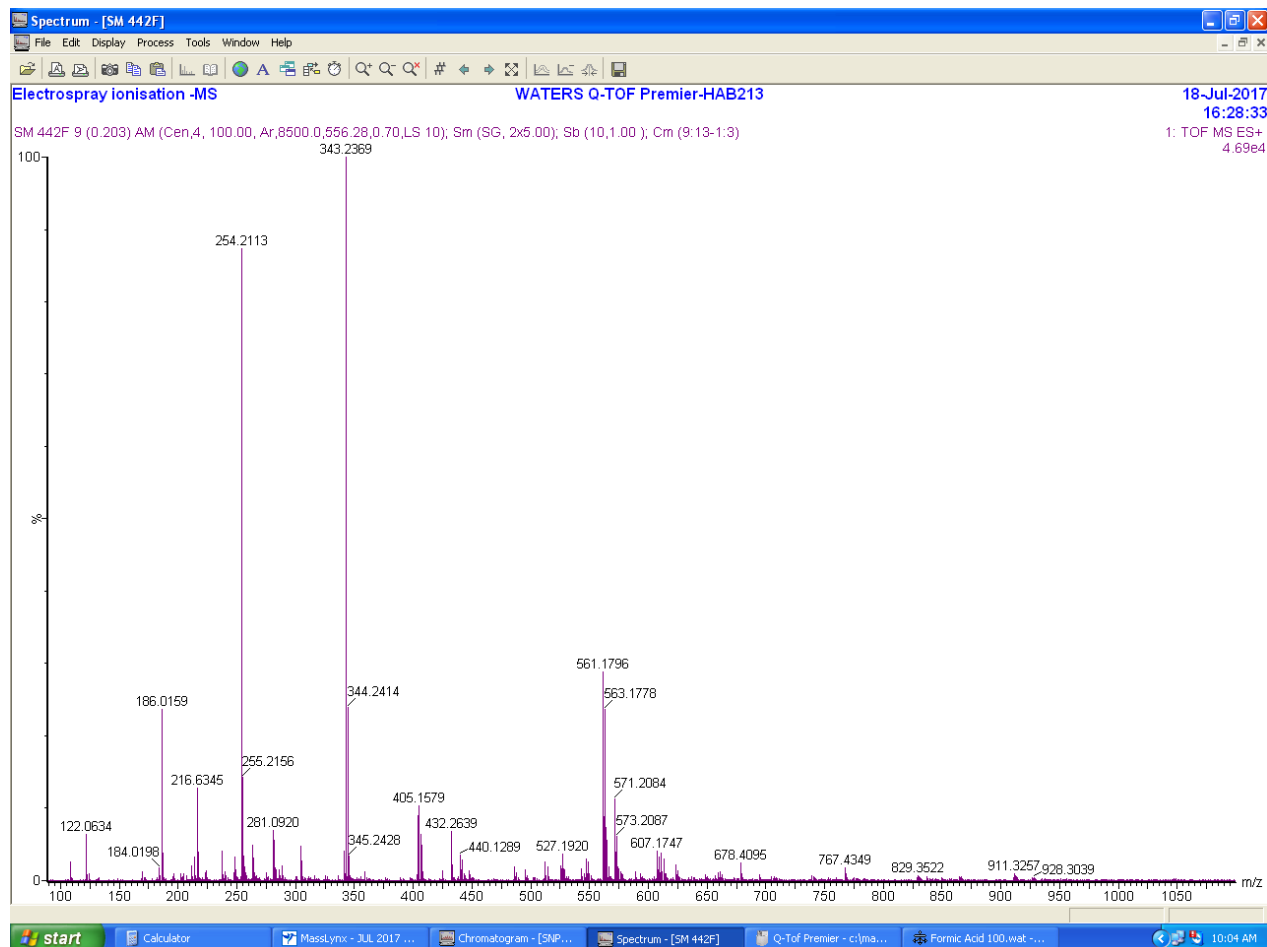

| Observed envelope | Observed for                                                                        | Calculated $m/z$ |
|-------------------|-------------------------------------------------------------------------------------|------------------|
| 186.0159          | Ferrocenium ion                                                                     | 186.0132         |
| 254.2113          | 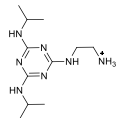 | 254.2093         |
| 343.2369          | Imd-H                                                                               | 343.2359         |
| 440.1289          | $[\text{Cu}(\text{Imd})\text{Cl}]^+$                                                | 440.1265         |
| 561.1796          | $[\text{Cu}(\text{L-OMe})\text{Cl}]^+$                                              | 561.1793         |

Figure S 5. ESI-MS of the solution containing  $[\text{Cu}(\text{L-OMe})\text{Cl}_2]$  and 2 equivalent ferrocene after purging  $\text{SO}_2$  (Negative ion mode) in  $\text{CH}_3\text{CN}$

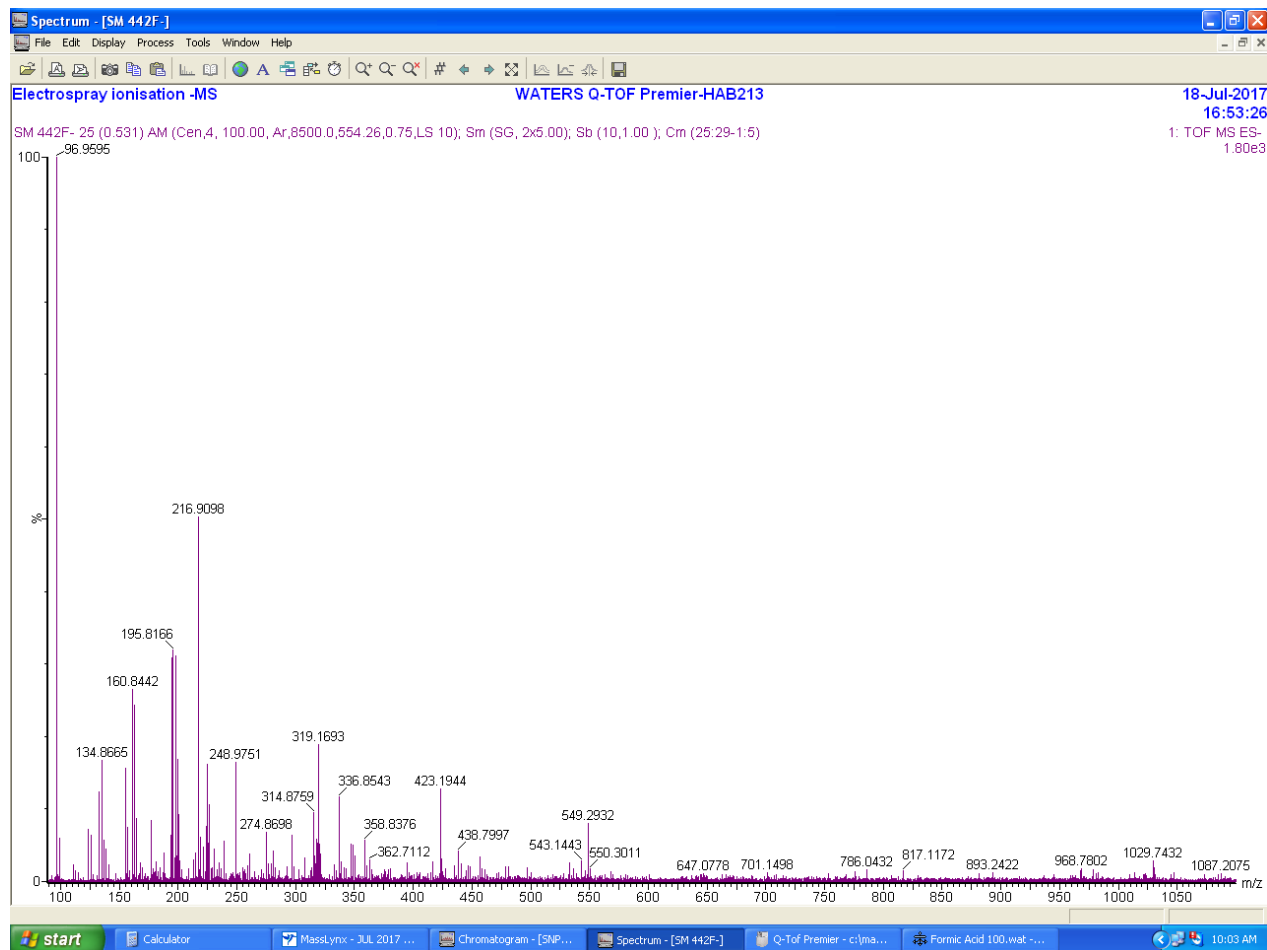

| Observed envelope | Observed for     | Calculated $m/z$ |
|-------------------|------------------|------------------|
| 96.9595           | $\text{HSO}_4^-$ | 96.9596          |

Figure S 6. Simulated ESI-MS for  $\text{HSO}_4^-$  anion

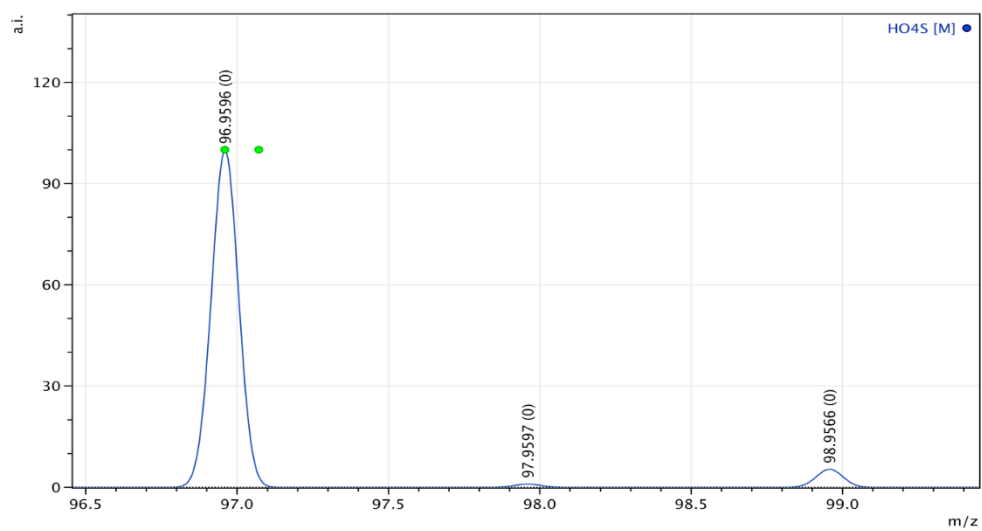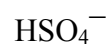

Figure S 7. ESI-MS of the solution containing anhydrous  $\text{CuCl}_2$  and 2 equivalent ferrocene after purging  $\text{SO}_2$  (Negative ion mode) showing no formation of  $\text{SO}_2$  activated products.

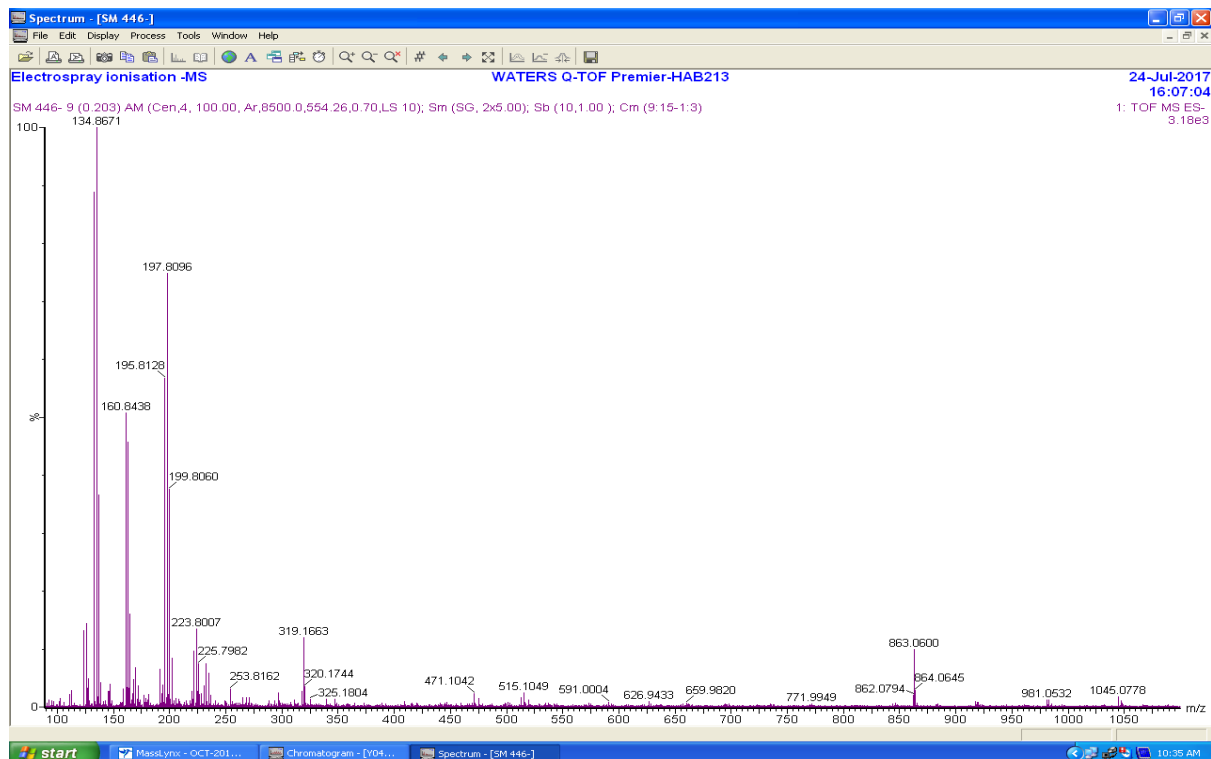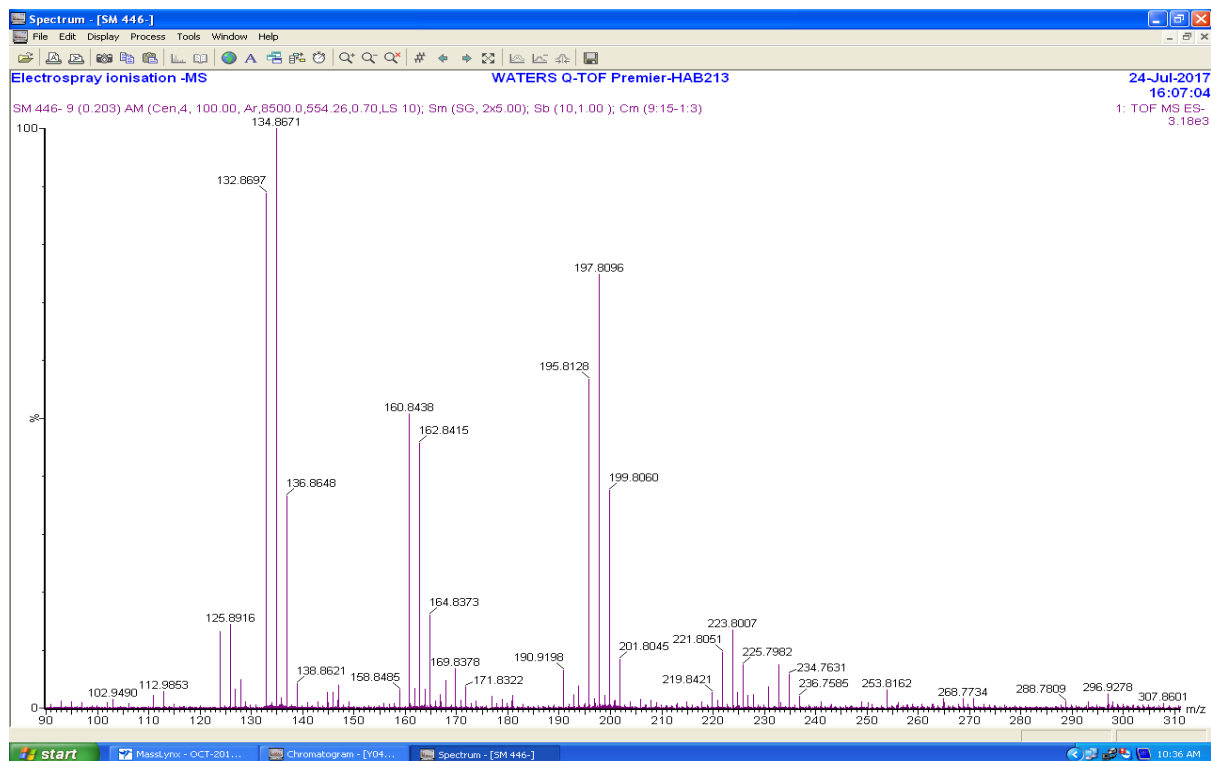

Figure S 8. ESI-MS of the ferrocene solution after purging SO<sub>2</sub> (Negative ion mode) showing no formation of SO<sub>2</sub> activated products.

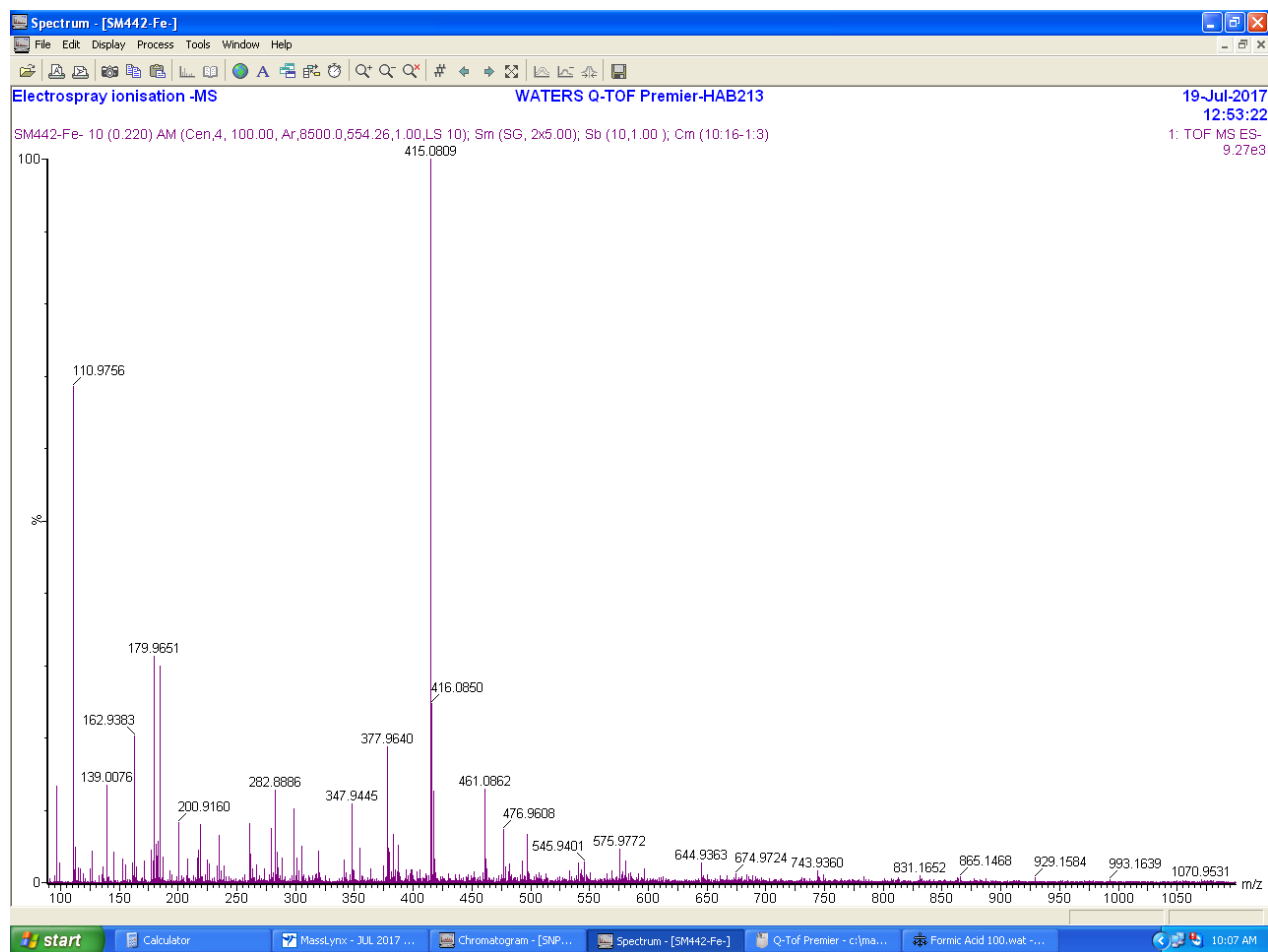

Figure S 9. ESI-MS of the solution containing [Cu(L-OMe)Cl<sub>2</sub>] and 2 equivalent ferrocene after purging SO<sub>2</sub> (Positive ion mode) in CH<sub>3</sub>CN after 3 days showing no peaks for [Cu(L-OMe)Cl]<sup>+</sup>

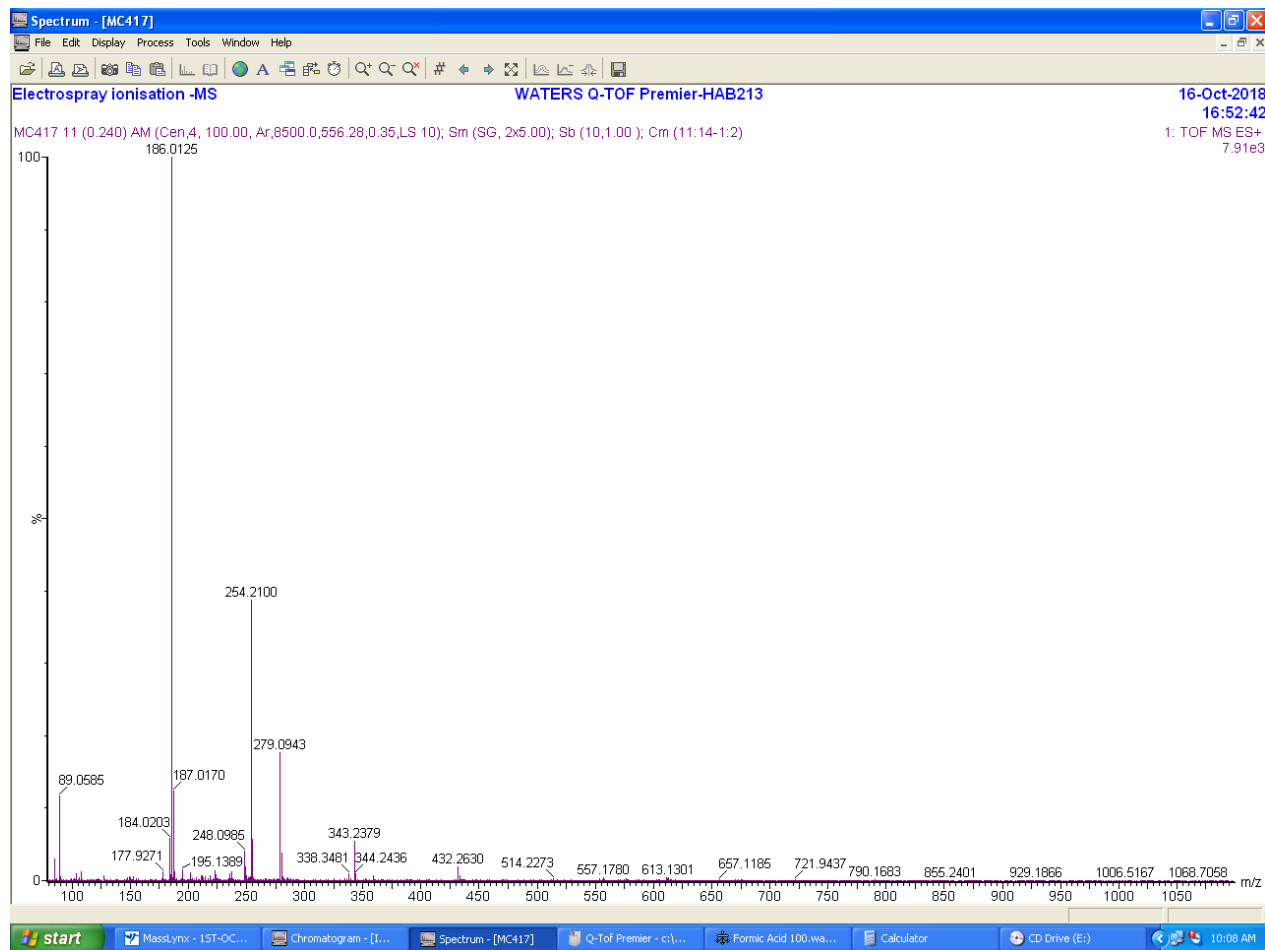

| Observed envelope | Observed for                                                                        | Calculated <i>m/z</i> |
|-------------------|-------------------------------------------------------------------------------------|-----------------------|
| 186.0125          | Ferrocenium ion                                                                     | 186.0131              |
| 254.2100          | 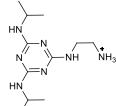 | 254.2093              |
| 343.2379          | Imd-H                                                                               | 343.2359              |
| 432.2630          |  | 432.2624              |

Figure S 10. ESI-MS of the solution containing  $[\text{Cu}(\text{L-OMe})\text{Cl}_2]$  and 2 equivalent ferrocene after purging  $\text{SO}_2$  (Negative ion mode) in  $\text{CH}_3\text{CN}$  after 3 days

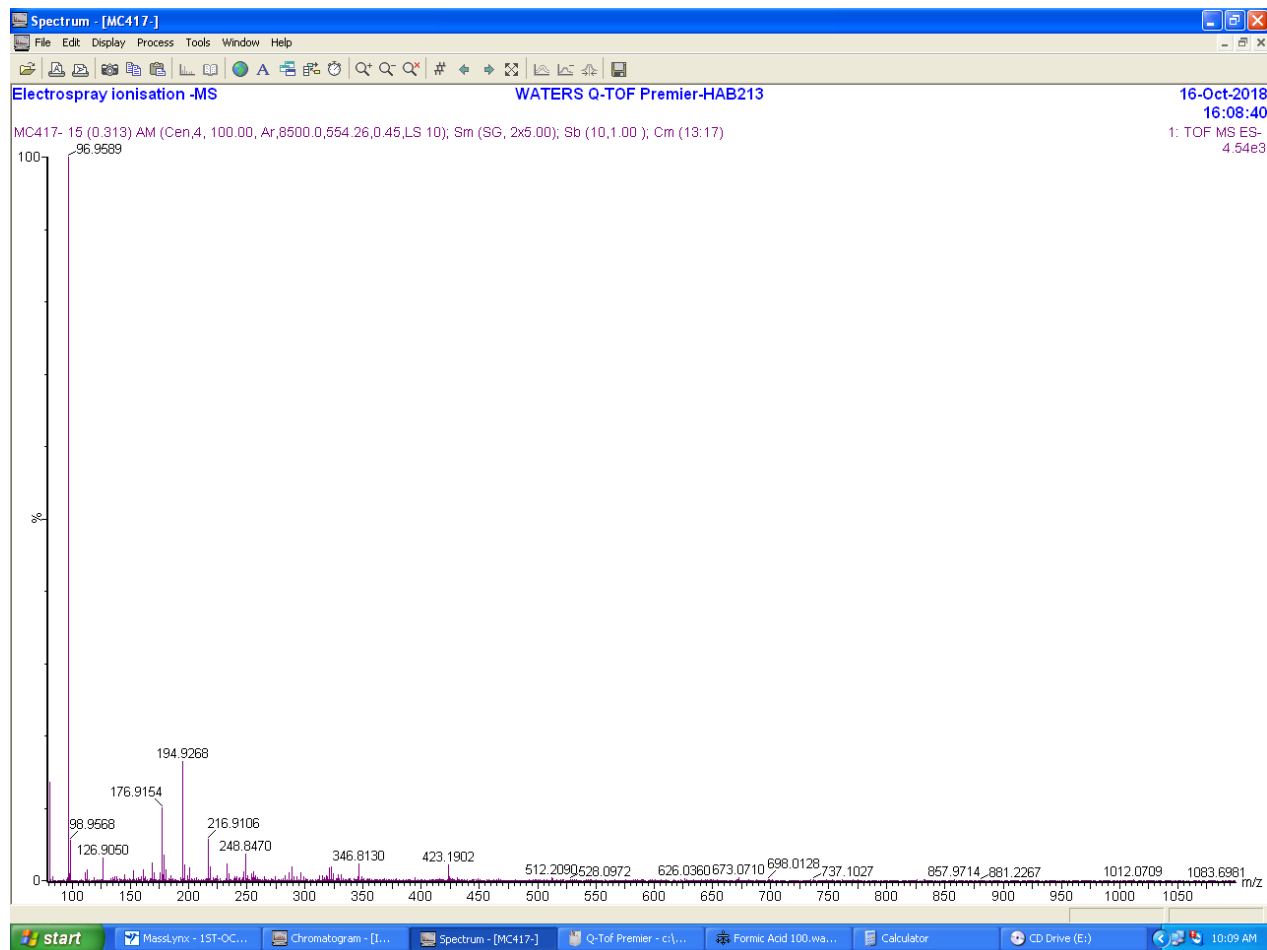

| Observed envelope | Observed for                   | Calculated $m/z$ |
|-------------------|--------------------------------|------------------|
| 96.9589           | $\text{HSO}_4^-$               | 96.9596          |
| 194.9268          | $[\text{H}(\text{HSO}_4)_2]^-$ | 194.9269         |



**Spectrum - [MC-409.B]**

File Edit Display Process Tools Window Help

Electrospray ionisation-MS WATERS Q-TOF Premier-HAB213 15-Oct-2018 16:01:30

MC-409-B 9 (0.203) AM (Cen,4, 100.00, Ar,8500.0,556.28,1.00,LS 10); Sm (SG, 2x5.00); Sb (10,1.00 ); Cm (7:31-165:185)

1: TOF MS ES+ 1.84e5

Mass spectrum plot showing relative intensity (%) on the y-axis and m/z on the x-axis. The base peak is at m/z 343.2299. Other significant peaks are labeled at m/z 140.0737, 172.1209, 202.5752, 254.2059, 255.2146, 279.0972, 338.3445, 344.2404, 404.1602, 440.1282, 442.1271, 443.1325, 561.1851, 621.3262, 675.6844, 729.4512, 828.2157, 917.2329, 976.1854, 1038.2652, and 1259.4529.

start 123 - HyperTerminal MassLynx - 15T-OCT ... Chromatogram - [AK1... Spectrum - [MC-409-B] Q-ToF Premier - c:\ma... Oct 25 2018 (E) 9:40 AM

21

Figure S 12. Simulated ESI-MS of  $[\text{Cu}(\text{Tim-H})(\text{H}_2\text{O})\text{Cl}_2](\text{OTf})$  for  $[\text{Cu}(\text{Tim})\text{Cl}]^+$

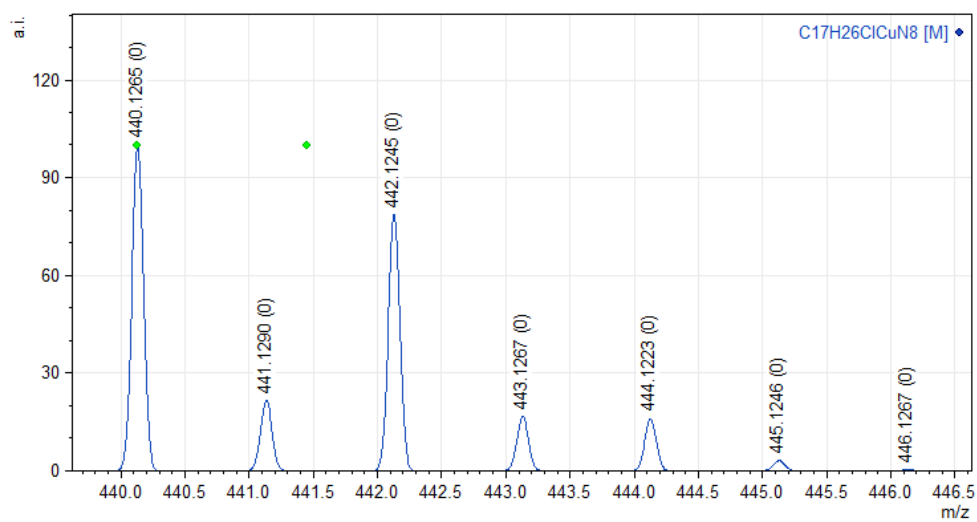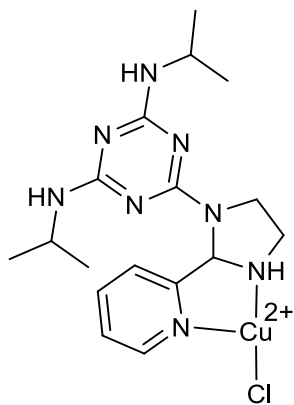

$[\text{Cu}(\text{Tim})\text{Cl}]^+$

Figure S 13. ORTEP of [Cu(Tim-H)(H<sub>2</sub>O)Cl<sub>2</sub>](OTf) drawn at 50% probability level

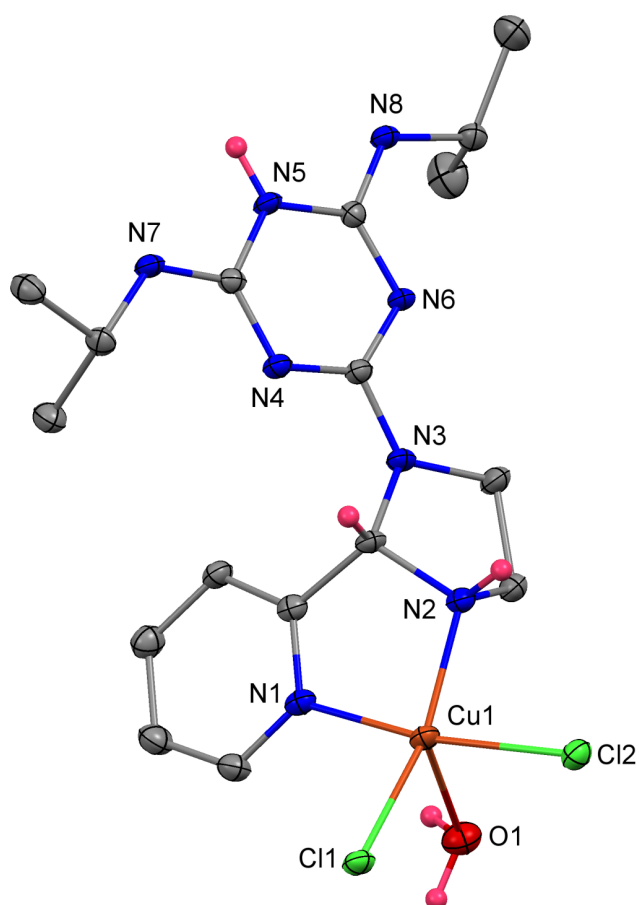

Figure S 14. One-dimensional hydrogen-bonded chain of [Cu(Tim-H)(H<sub>2</sub>O)Cl<sub>2</sub>](OTf)

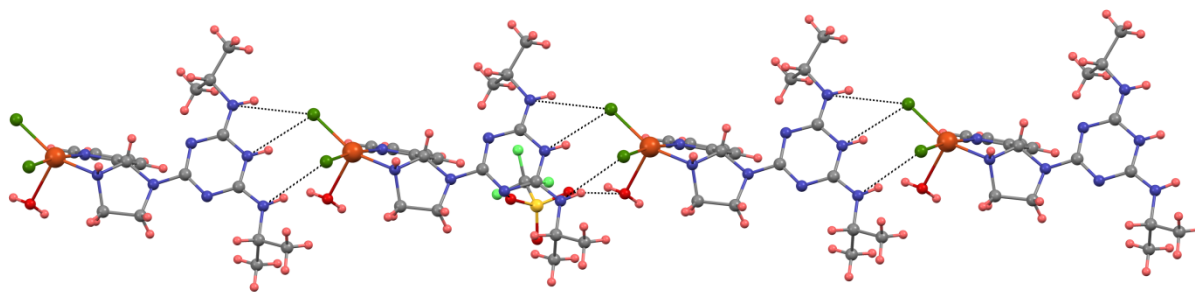

Figure S 15.  $^1\text{H}$  NMR of  $N^2,N^4$ -diisopropyl- $N^6$ -(2-((pyridin-2-ylmethyl)amino)ethyl)-1,3,5-triazine-2,4,6-triamine in  $\text{CDCl}_3$ .

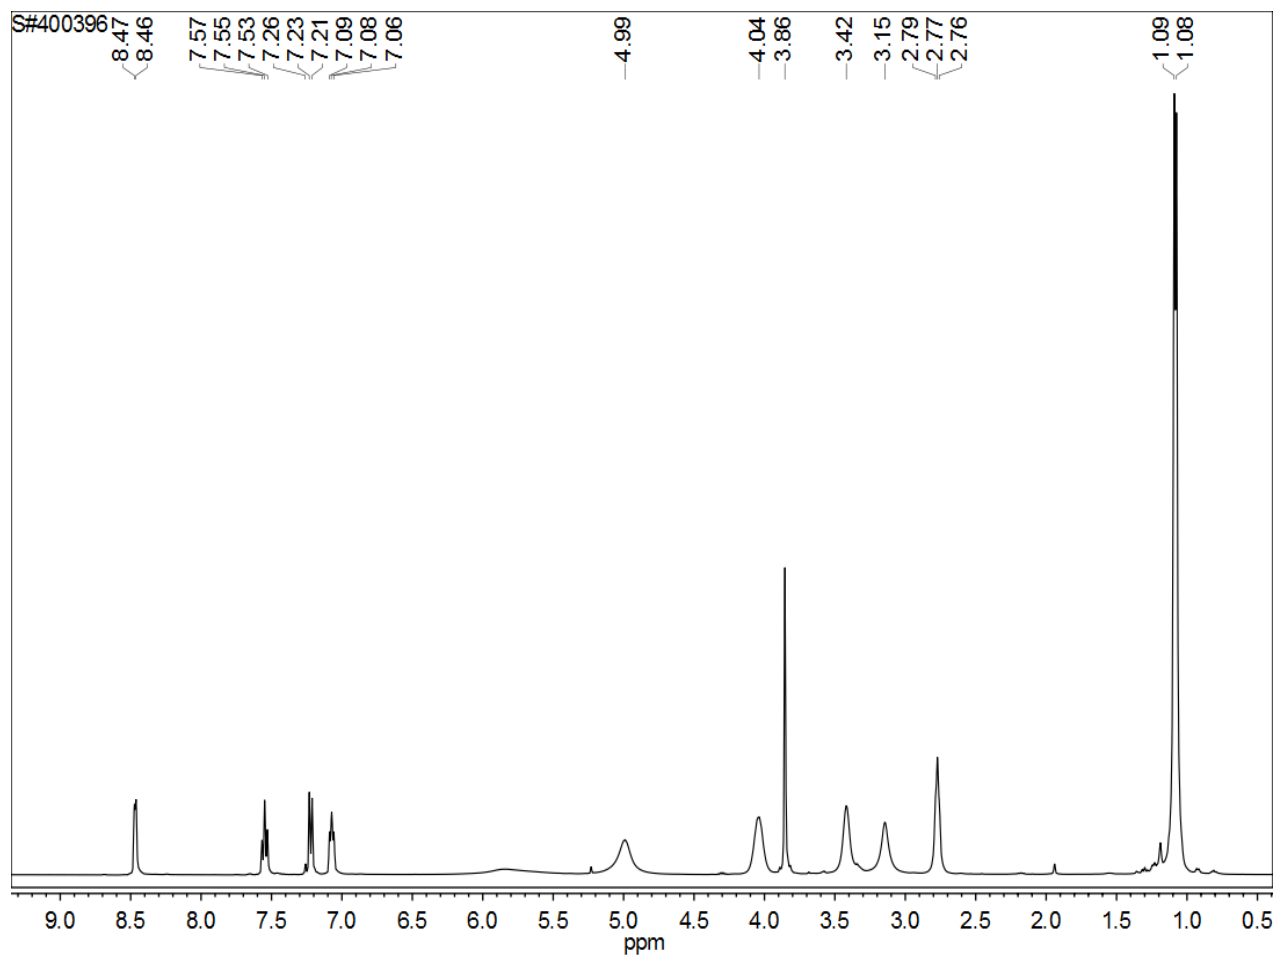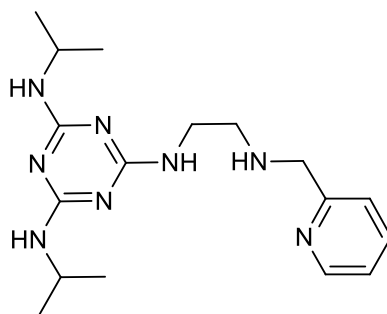

Figure S 16.  $^{13}\text{C}$  NMR of  $N^2,N^4$ -diisopropyl- $N^6$ -(2-((pyridin-2-ylmethyl)amino)ethyl)-1,3,5-triazine-2,4,6-triamine in  $\text{CDCl}_3$ .

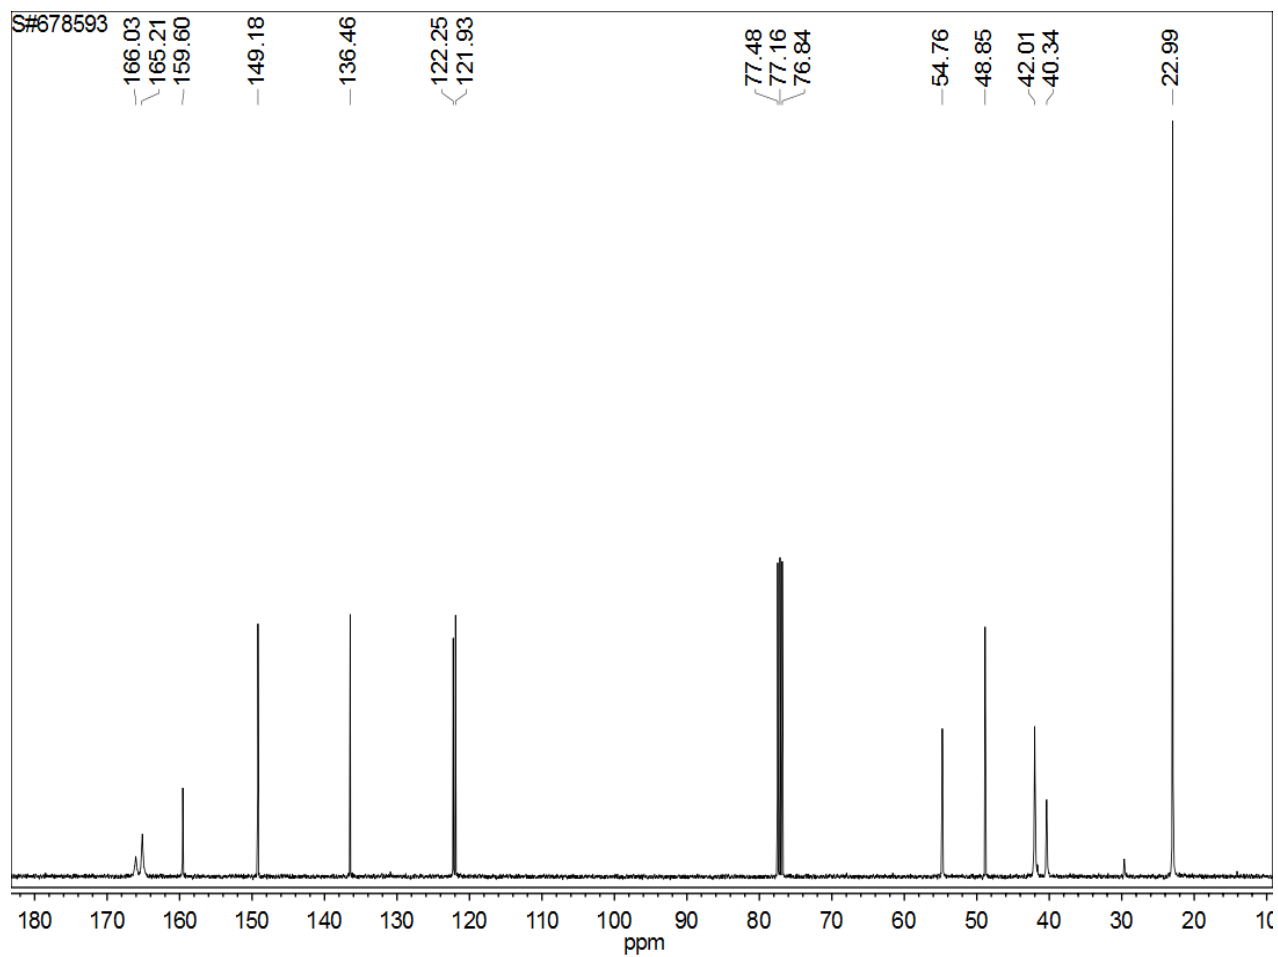

Figure S 17.  $^1\text{H}$  NMR of [L-H] in  $\text{CDCl}_3$

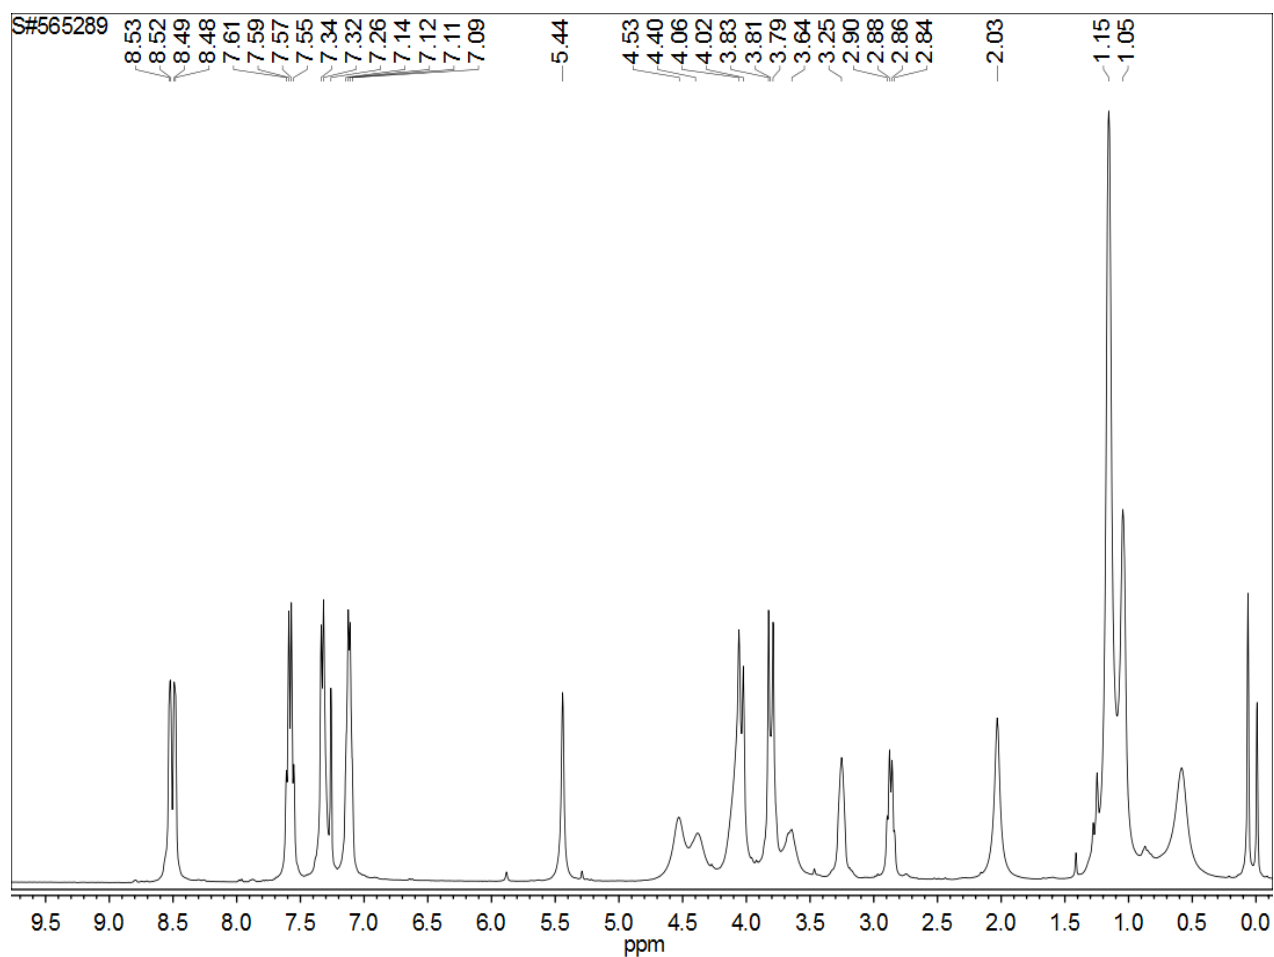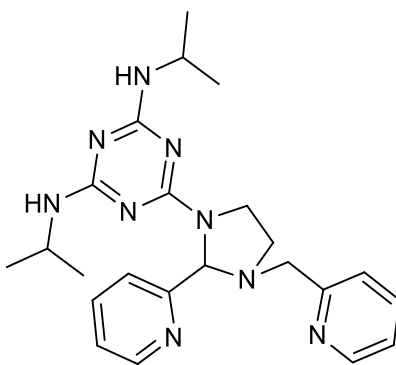

Figure S 18.  $^{13}\text{C}$  NMR of [L-H] in  $\text{CDCl}_3$

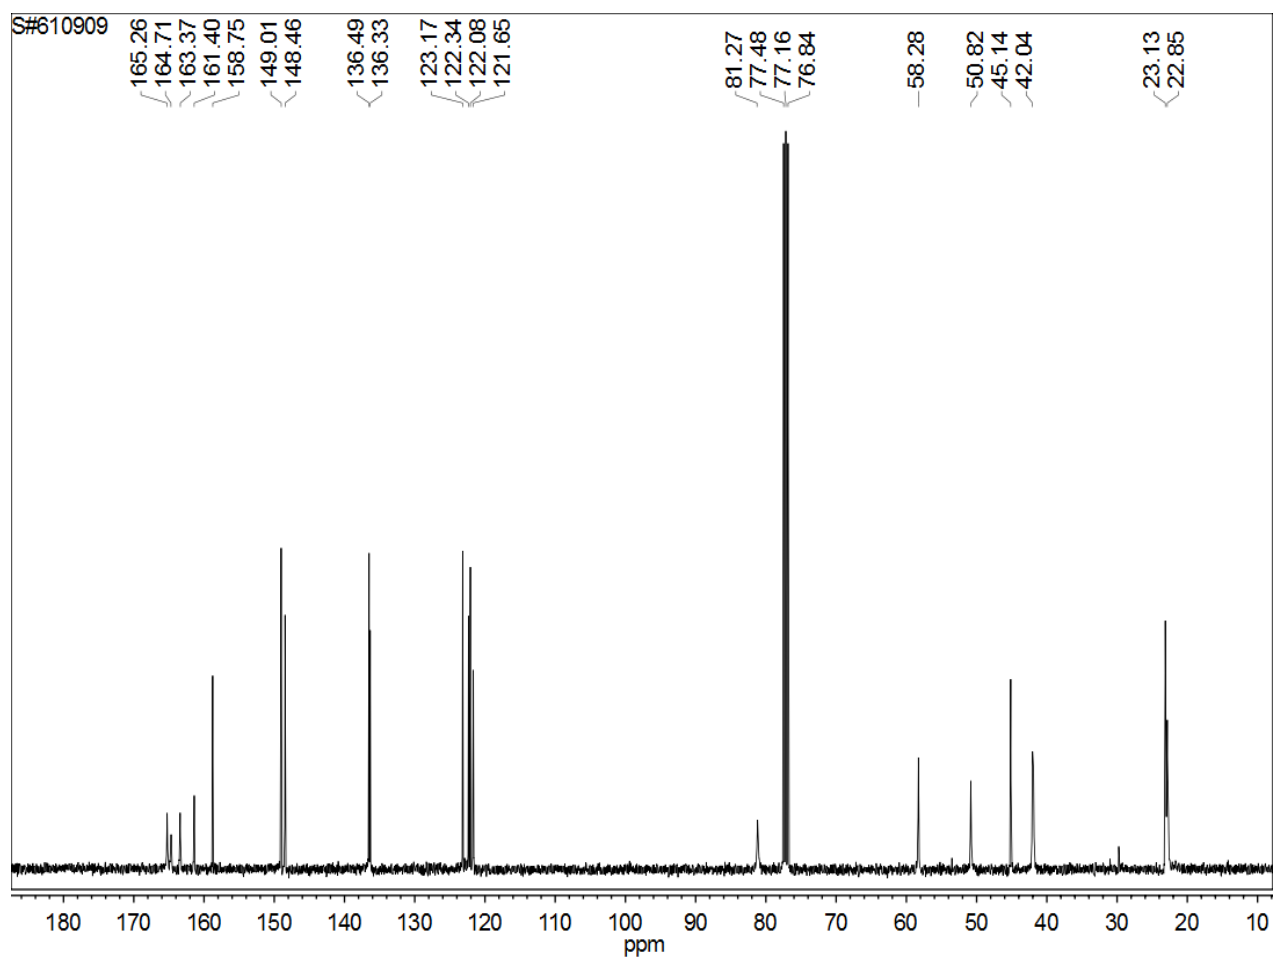



Figure S 19. ESI-MS of [L-H]

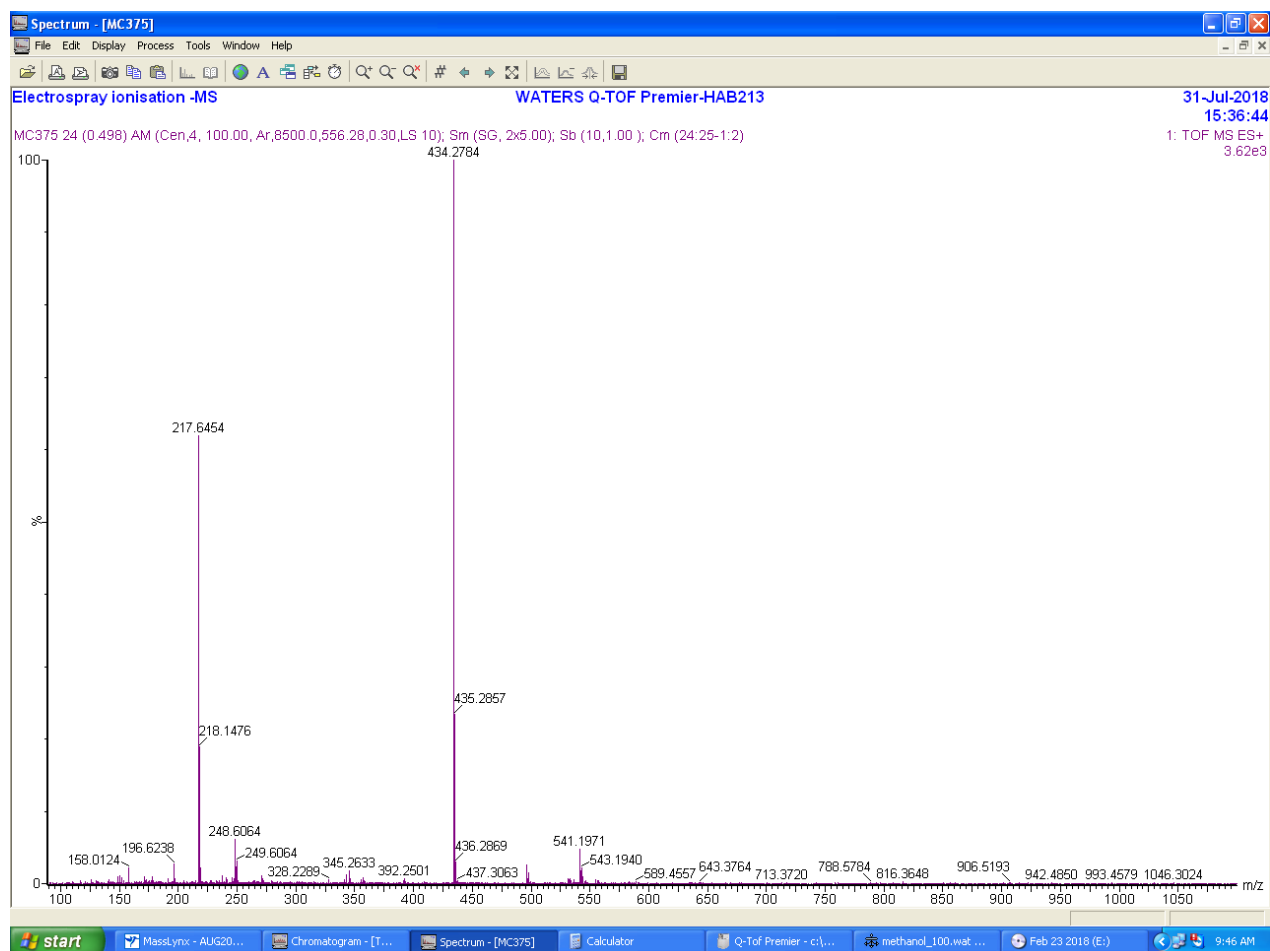

| Observed envelope | Observed for | Calculated $m/z$ |
|-------------------|--------------|------------------|
| 217.6454          | [L-H]+ 2H    | 217.6429         |
| 434.2784          | [L-H]+ H     | 434.2781         |

Figure S 20. Simulated ESI-MS of [L-H] for [(L-H)+H]

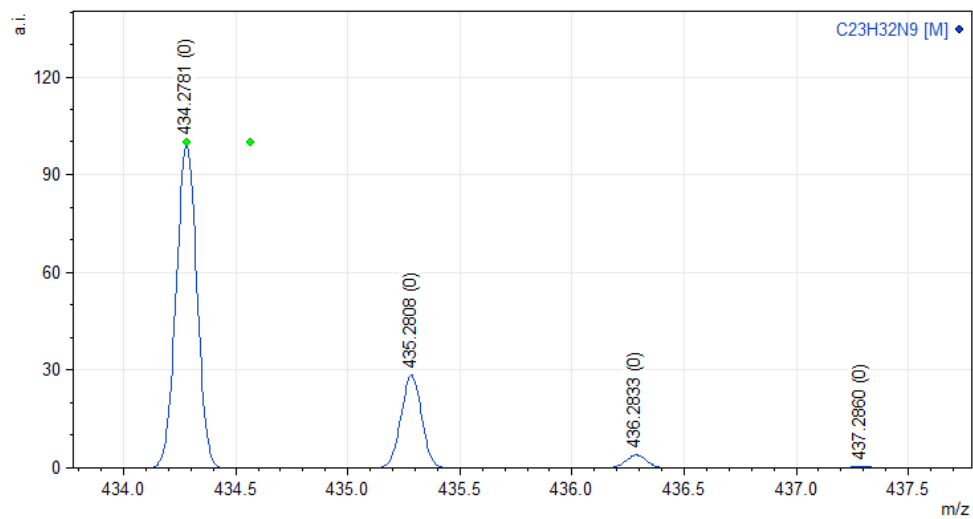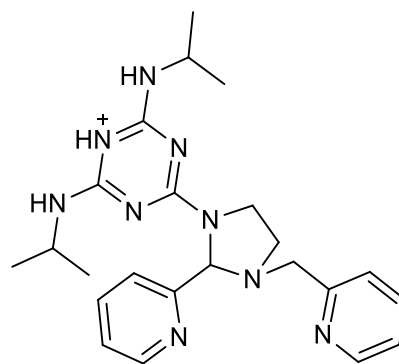

[(L-H)+H]

Figure S 21. ORTEP of [L-H] drawn at 50% probability level

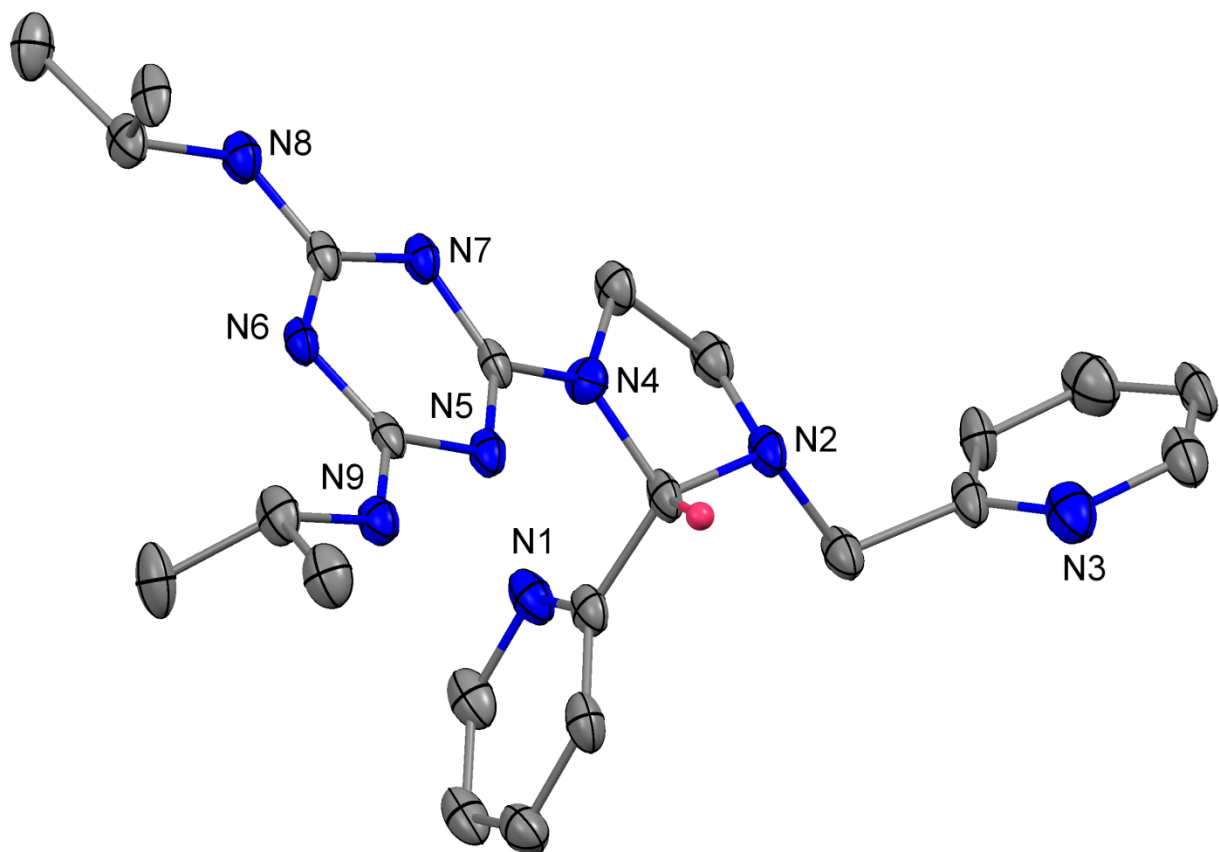

Figure S 22. ESI-MS of [Cu(L-H)Cl<sub>2</sub>]

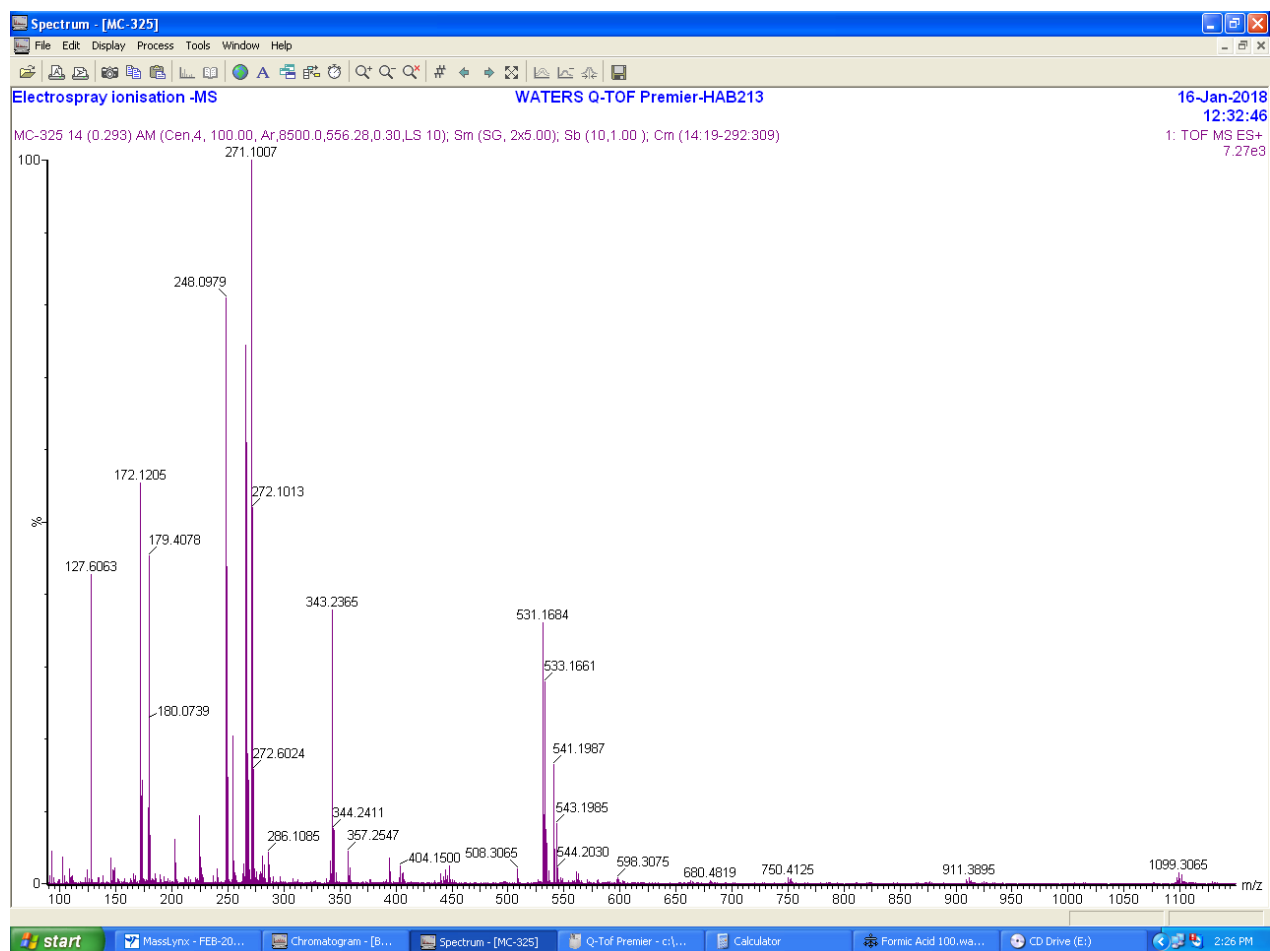

| Observed envelope | Observed for                  | Calculated $m/z$ |
|-------------------|-------------------------------|------------------|
| 248.0979          | [Cu(L-H)] <sup>2+</sup>       | 248.0999         |
| 266.0863          | [Cu(L-H)+HCl] <sup>2+</sup>   | 266.0882         |
| 271.1007          | [Cu(L-H)+HCOOH] <sup>2+</sup> | 271.1026         |
| 531.1684          | [Cu(L-H)Cl] <sup>+</sup>      | 531.1687         |
| 541.1987          | [Cu(L-H)(HCOO)] <sup>+</sup>  | 541.1975         |

Figure S 23. Simulated ESI-MS of  $[\text{Cu}(\text{L-H})\text{Cl}_2]$  for  $[\text{Cu}(\text{L-H})\text{Cl}]^+$

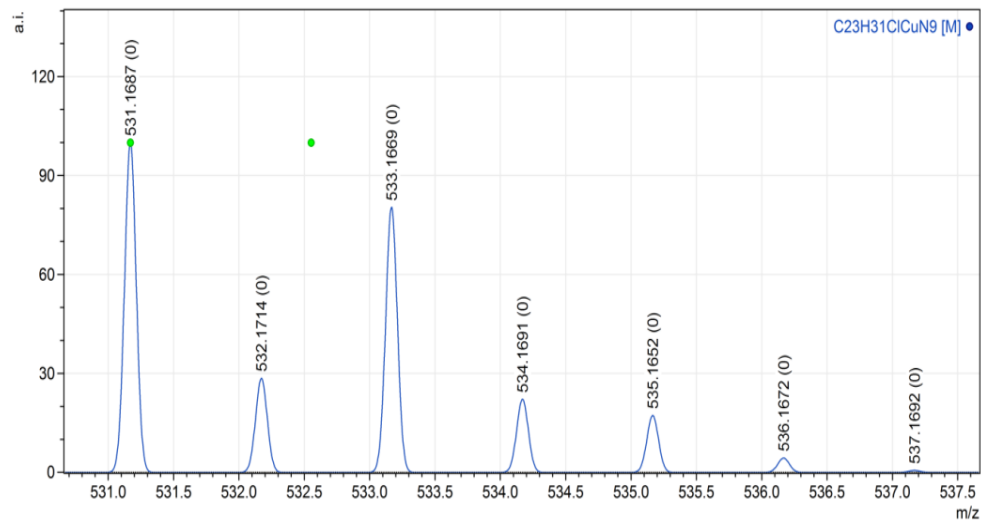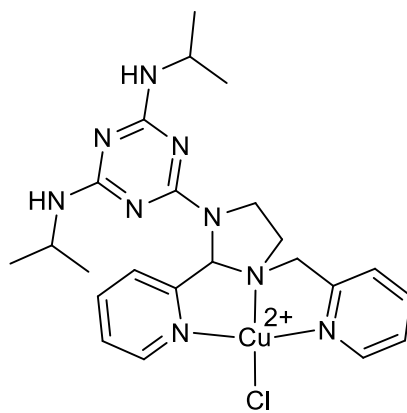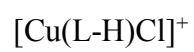

Figure S 24. ORTEP of  $[\text{Cu}(\text{L-H})\text{Cl}_2]$  drawn at 50% probability level

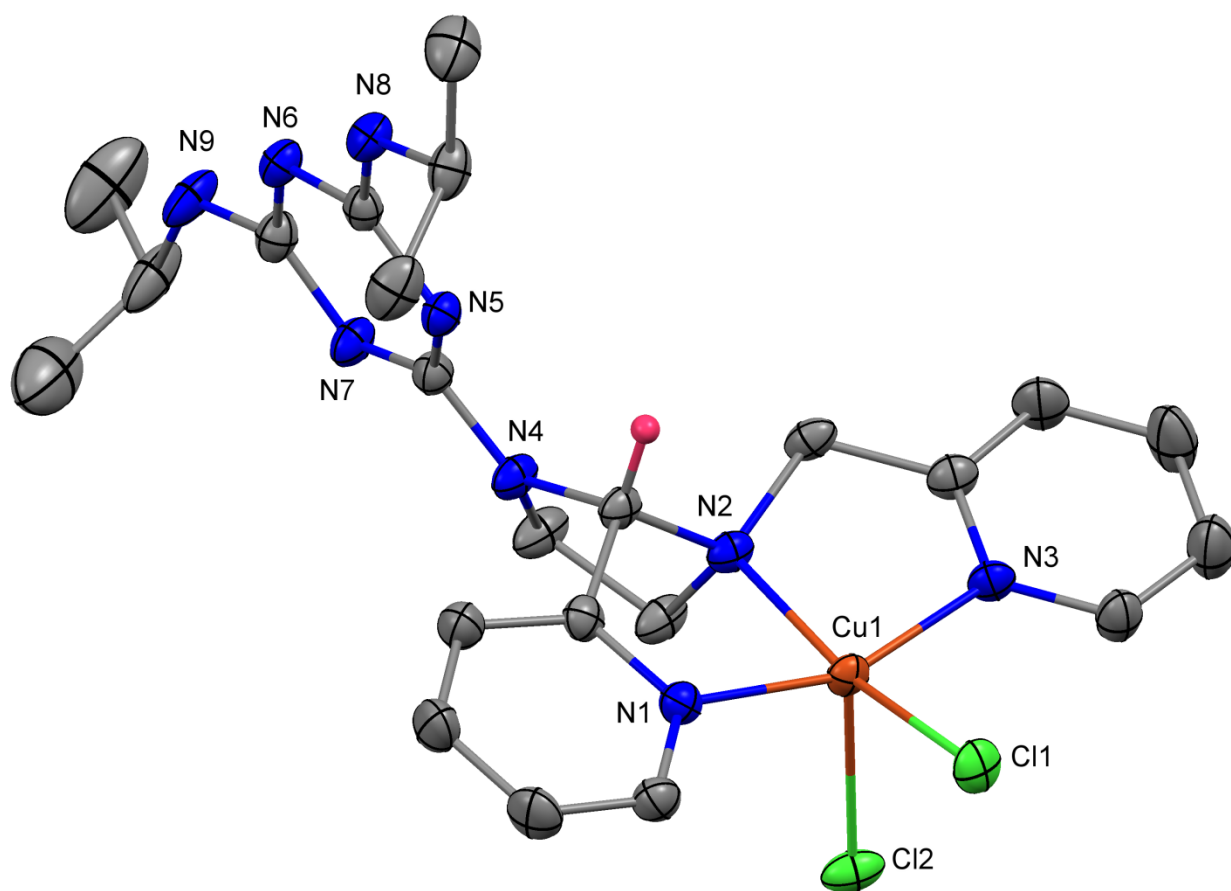

Figure S 25. ESI-MS of  $[\text{Cu}(\text{L-H})(\text{H}^+)(\text{OTf})(\text{Cl})](\text{OTf})$

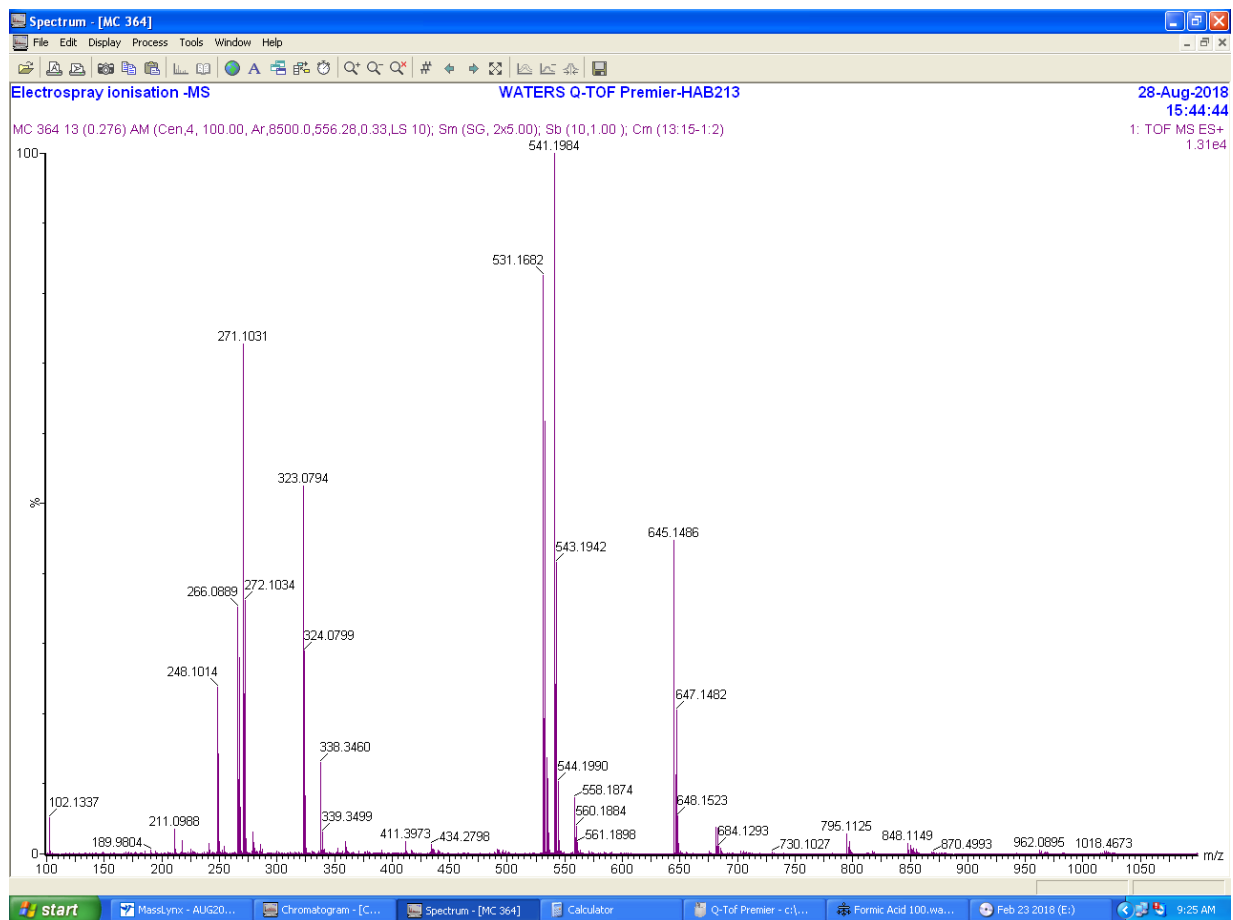

| Observed envelope | Observed for                                                                       | Calculated $m/z$ |
|-------------------|------------------------------------------------------------------------------------|------------------|
| 248.1014          | $[\text{Cu}(\text{L-H})]^{2+}$                                                     | 248.0999         |
| 266.0889          | $[\text{Cu}(\text{L-H})+\text{HCl}]^{2+}$                                          | 266.0882         |
| 271.1031          | $[\text{Cu}((\text{L-H})+\text{HCOOH})]^{2+}$                                      | 271.1026         |
| 323.0794          | $[\text{Cu}(\text{L-H})+\text{CF}_3\text{SO}_3\text{H}]^{2+}$                      | 323.0798         |
| 531.1682          | $[\text{Cu}(\text{L-H})\text{Cl}]^+$                                               | 531.1687         |
| 541.1984          | $[\text{Cu}(\text{L-H})(\text{HCOO})]^+$                                           | 541.1975         |
| 645.1486          | $[\text{Cu}(\text{L-H})(\text{CF}_3\text{SO}_3)]^+$                                | 645.1519         |
| 681.1262          | $[\text{Cu}(\text{L-H})\text{Cl}+\text{CF}_3\text{SO}_3\text{H}]^+$                | 681.1285         |
| 795.1125          | $[\text{Cu}(\text{L-H})(\text{CF}_3\text{SO}_3)+\text{CF}_3\text{SO}_3\text{H}]^+$ | 795.1117         |

Figure S 26. Simulated ESI-MS of  $[\text{Cu}(\text{L-H})(\text{H}^+)(\text{OTf})(\text{Cl})](\text{OTf})$  for  $[\text{Cu}(\text{L-H})\text{Cl}+\text{CF}_3\text{SO}_3\text{H}]^+$

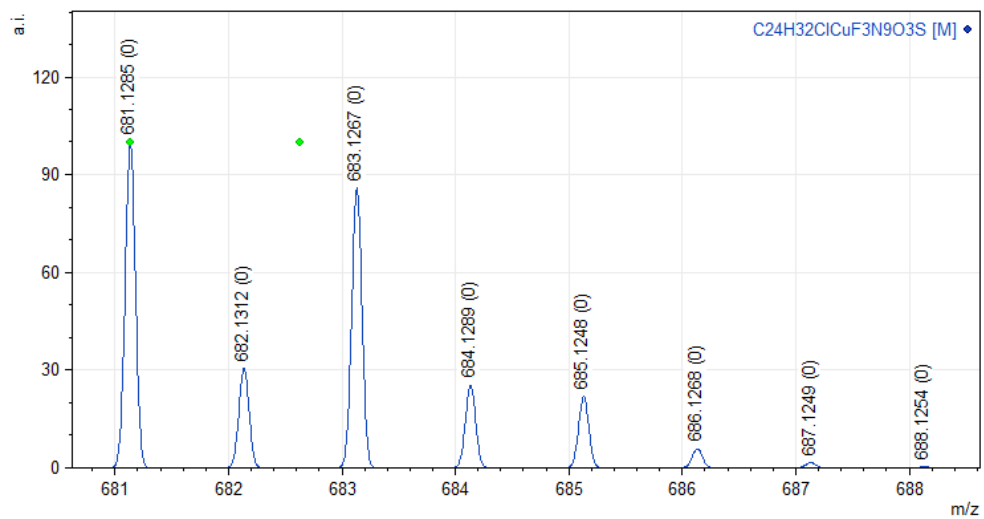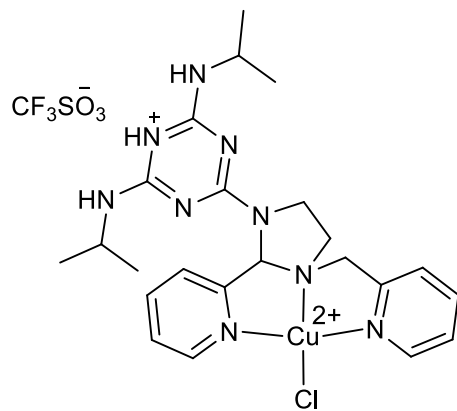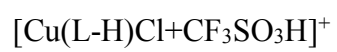



Figure S 27. Simulated ESI-MS of  $[\text{Cu}((\text{L-H})(\text{H}^+)(\text{OTf})\text{Cl})(\text{OTf})$  for  $[\text{Cu}(\text{L-H})(\text{CF}_3\text{SO}_3)+\text{CF}_3\text{SO}_3\text{H}]^+$

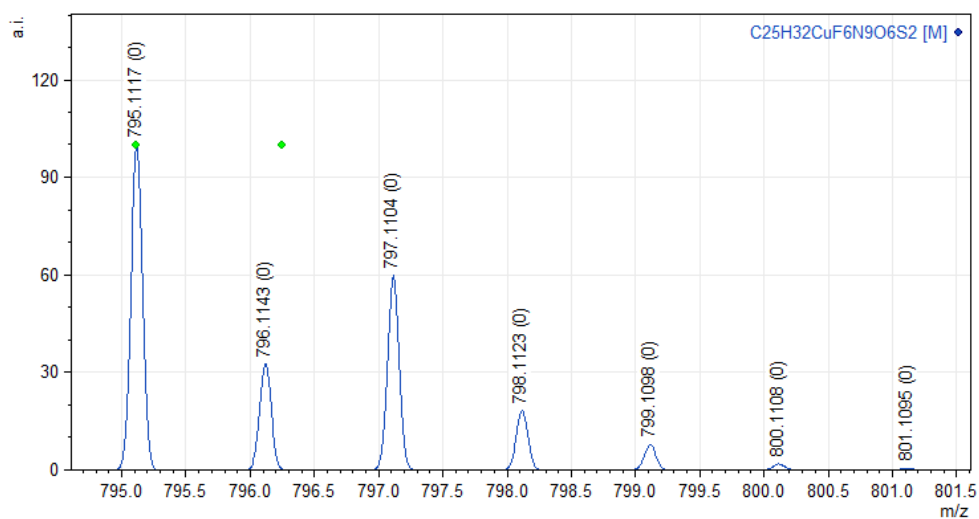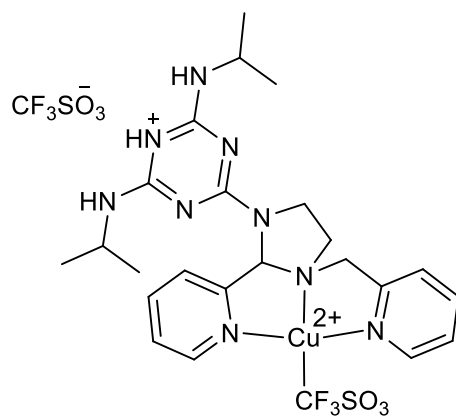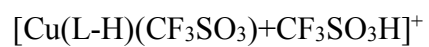

Figure S 28. ORTEP of  $[\text{Cu}(\text{L-H})(\text{H}^+)(\text{OTf})\text{Cl}](\text{OTf})$  drawn at 50% probability level

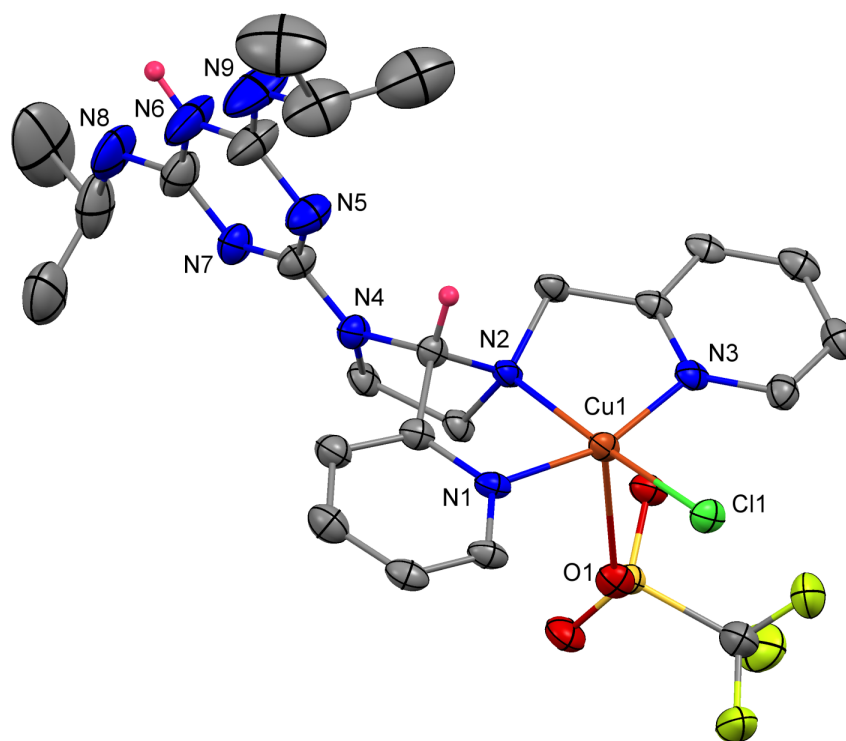

Figure S 29. ESI-MS of the solution containing [Cu(L-H)Cl<sub>2</sub>] and 2 equivalent ferrocene after purging SO<sub>2</sub> (Positive ion mode) in CH<sub>3</sub>CN

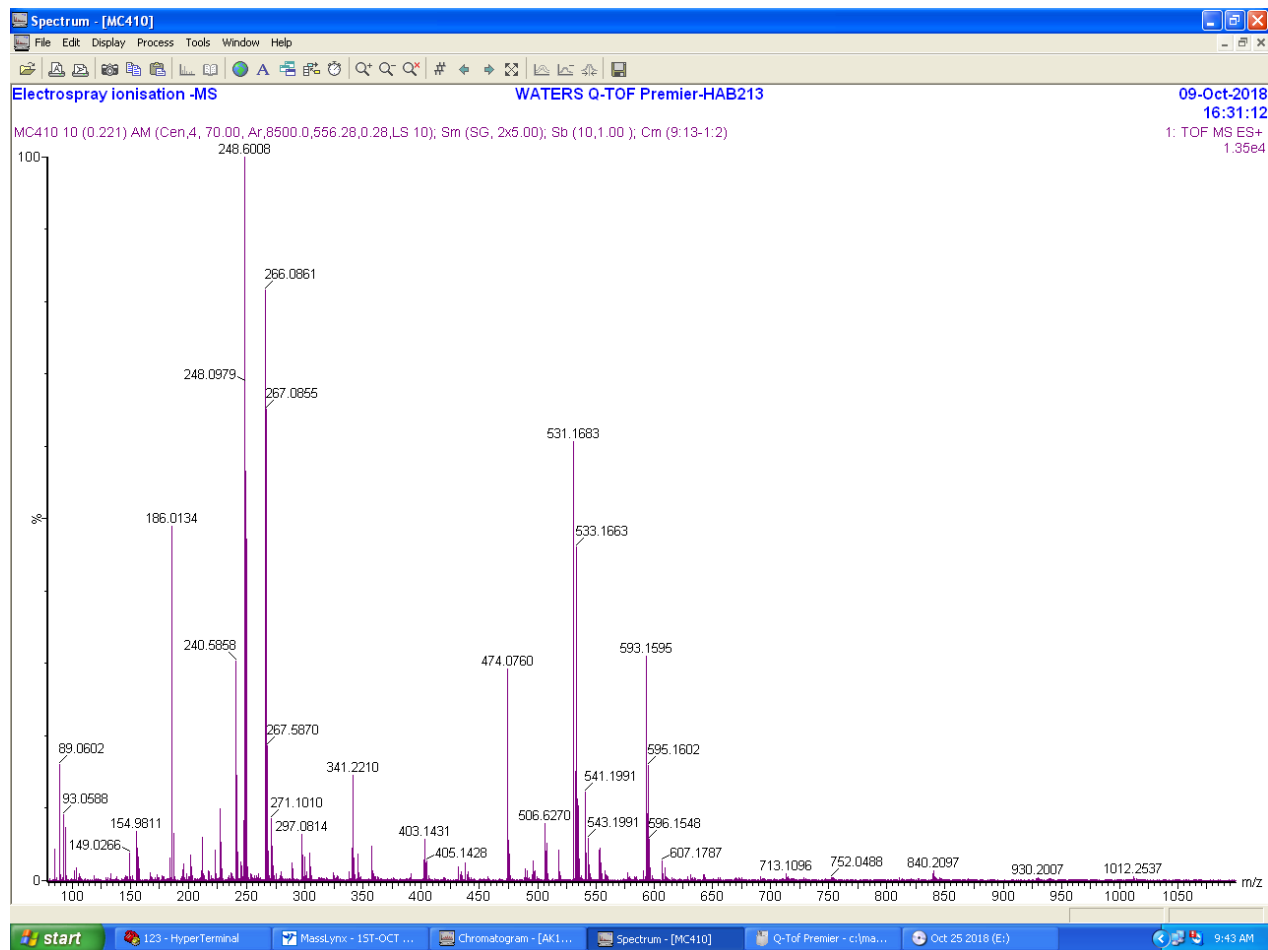

| Observed envelope | Observed for                              | Calculated $m/z$ |
|-------------------|-------------------------------------------|------------------|
| 186.0134          | Ferrocenium ion                           | 186.0131         |
| 248.0979          | [Cu(L-H)] <sup>2+</sup>                   | 248.0999         |
| 266.0861          | [Cu(L-H)+HCl] <sup>2+</sup>               | 266.0882         |
| 271.1010          | [Cu(L-H)+HCOOH] <sup>2+</sup>             | 271.1026         |
| 531.1683          | [Cu(L-H)Cl] <sup>+</sup>                  | 531.1687         |
| 541.1991          | [Cu(L-H)(HCOO)] <sup>+</sup>              | 541.1975         |
| 593.1595          | [Cu(L-H)(HSO <sub>4</sub> )] <sup>+</sup> | 593.1595         |

Figure S 30. ESI-MS of the solution containing [Cu(L-H)Cl<sub>2</sub>] and 2 equivalent ferrocene after purging SO<sub>2</sub> (Negative ion mode) in CH<sub>3</sub>CN

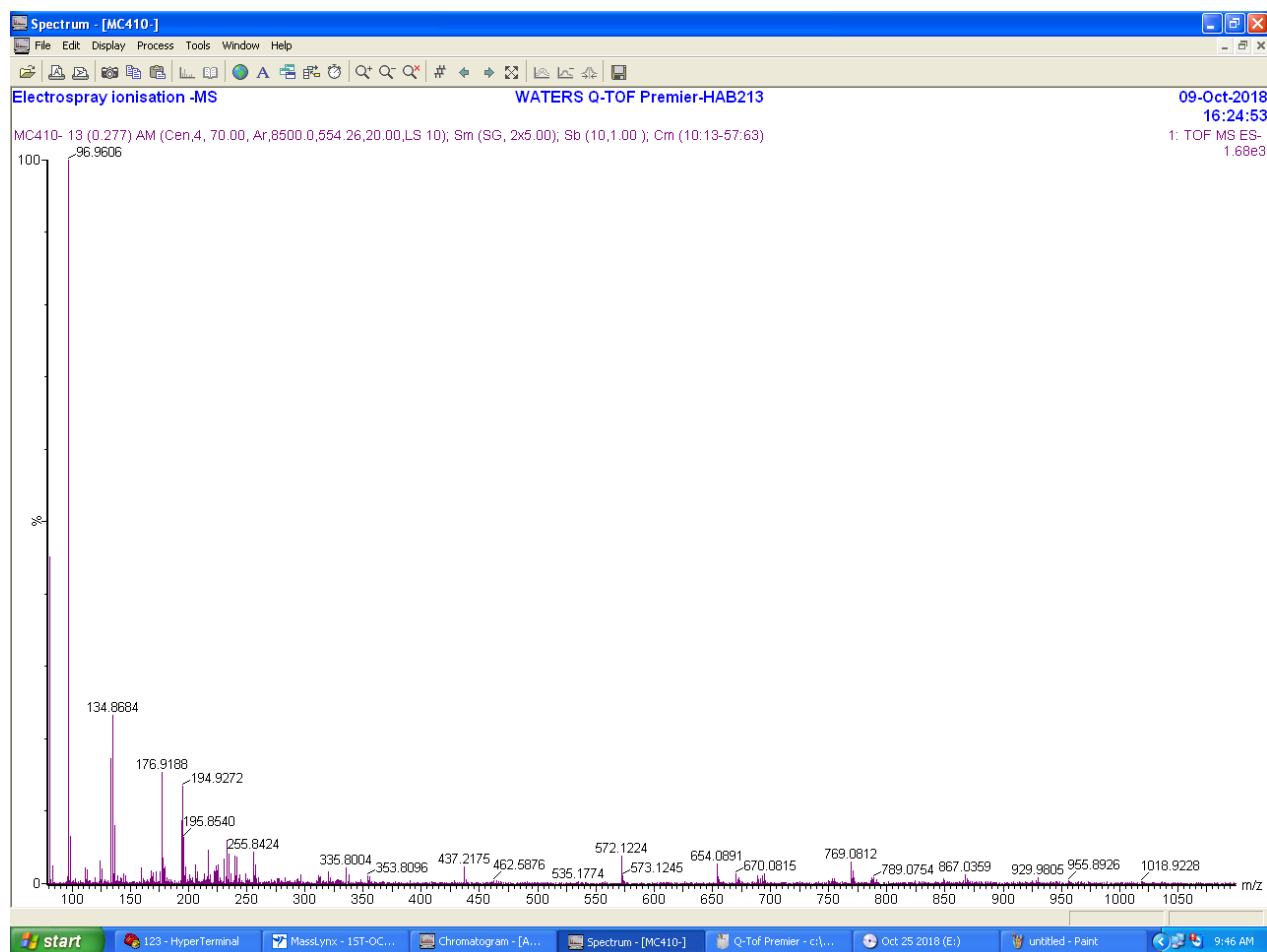

| Observed envelope | Observed for                   | Calculated $m/z$ |
|-------------------|--------------------------------|------------------|
| 96.9606           | $\text{HSO}_4^-$               | 96.9596          |
| 194.9272          | $[\text{H}(\text{HSO}_4)_2]^-$ | 194.9269         |

Figure S 31. ESI-MS of the solution containing  $[\text{Cu}(\text{L-H})\text{Cl}_2]$  and 51 equivalent ferrocene after purging  $\text{SO}_2$  (Positive ion mode) in  $\text{CH}_3\text{CN}$

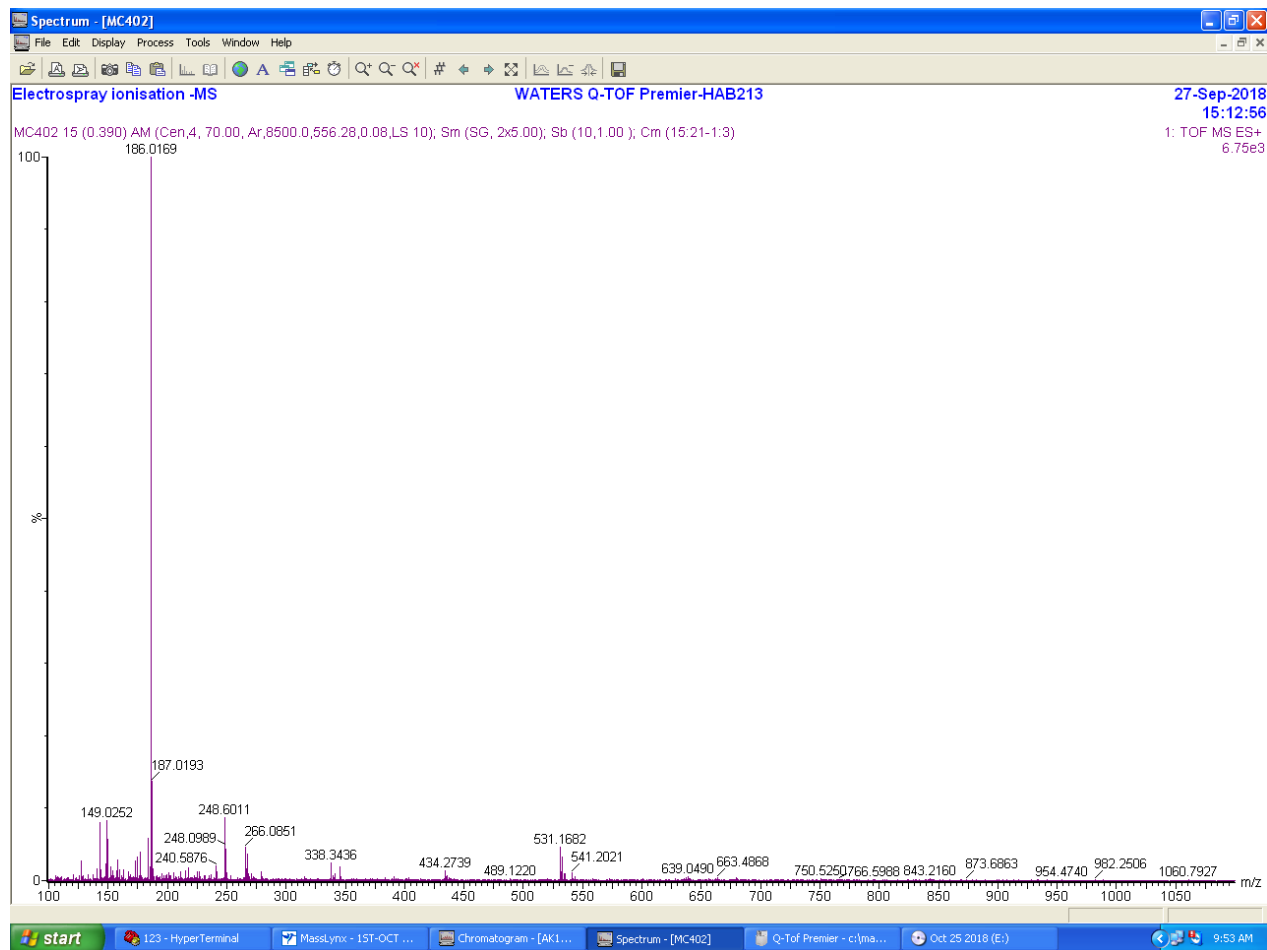

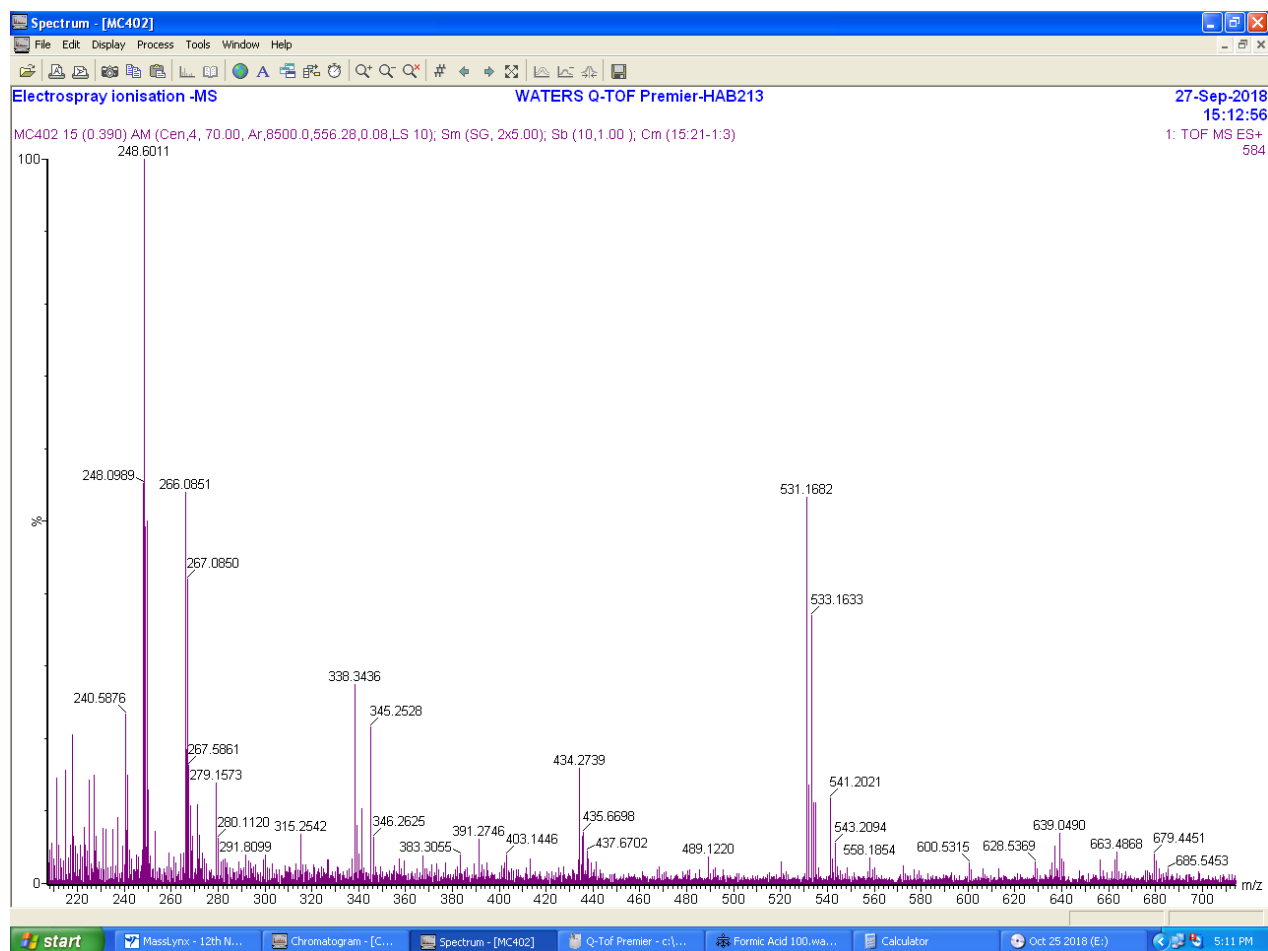

| Observed envelope | Observed for                              | Calculated $m/z$ |
|-------------------|-------------------------------------------|------------------|
| 186.0169          | Ferrocenium ion                           | 186.0131         |
| 248.0989          | $[\text{Cu}(\text{L-H})]^{2+}$            | 248.0999         |
| 266.0851          | $[\text{Cu}(\text{L-H})+\text{HCl}]^{2+}$ | 266.0882         |
| 434.2739          | $[(\text{L-H})+\text{H}^+]$               | 434.27881        |
| 531.1682          | $[\text{Cu}(\text{L-H})\text{Cl}]^+$      | 531.1687         |
| 541.2021          | $[\text{Cu}(\text{L-H})(\text{HCOO})]^+$  | 541.1975         |

Figure S 32. ESI-MS of the solution containing  $[\text{Cu}(\text{L-H})\text{Cl}_2]$  and 51 equivalent ferrocene after purging  $\text{SO}_2$  (Negative ion mode) in  $\text{CH}_3\text{CN}$

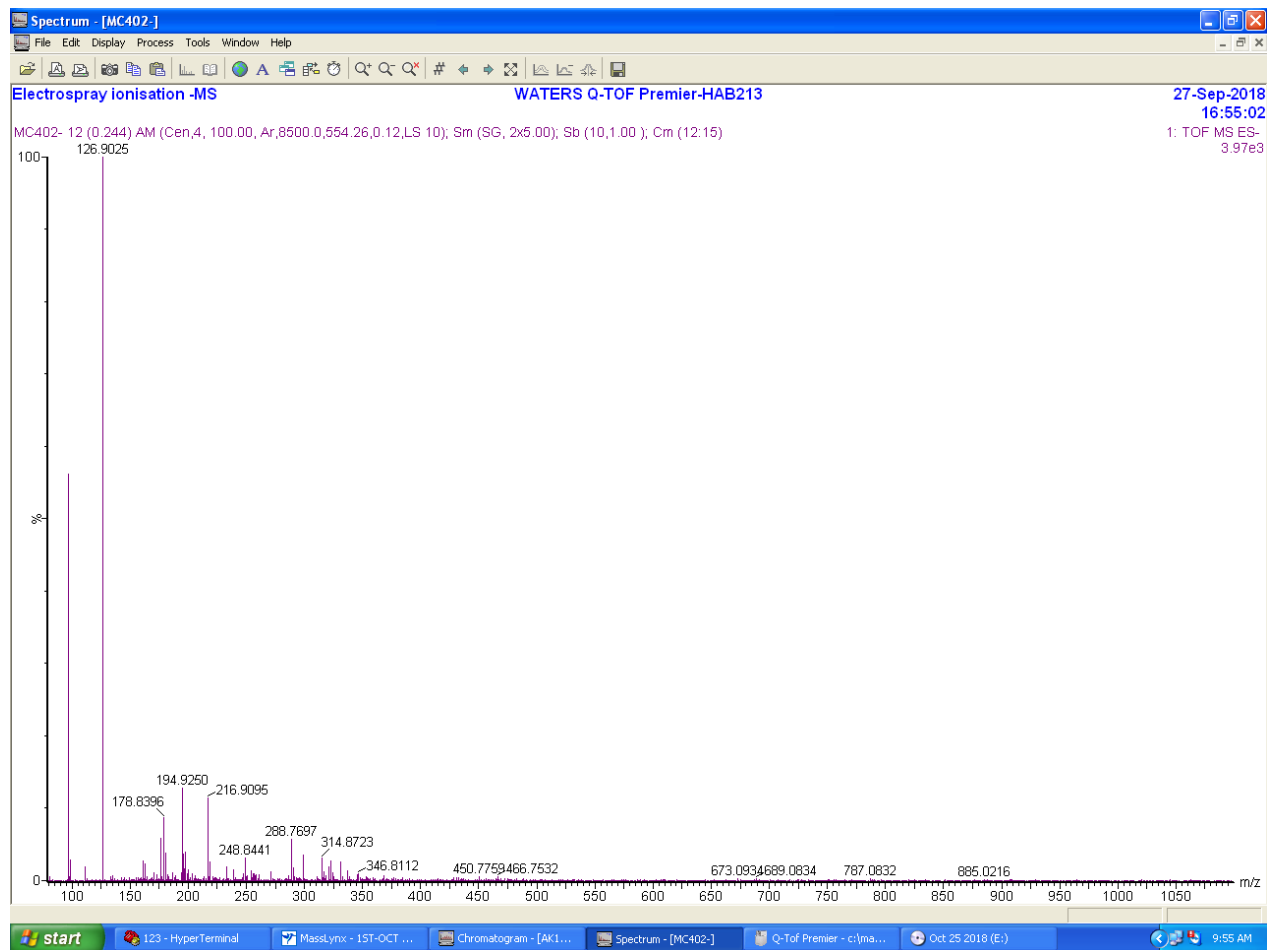

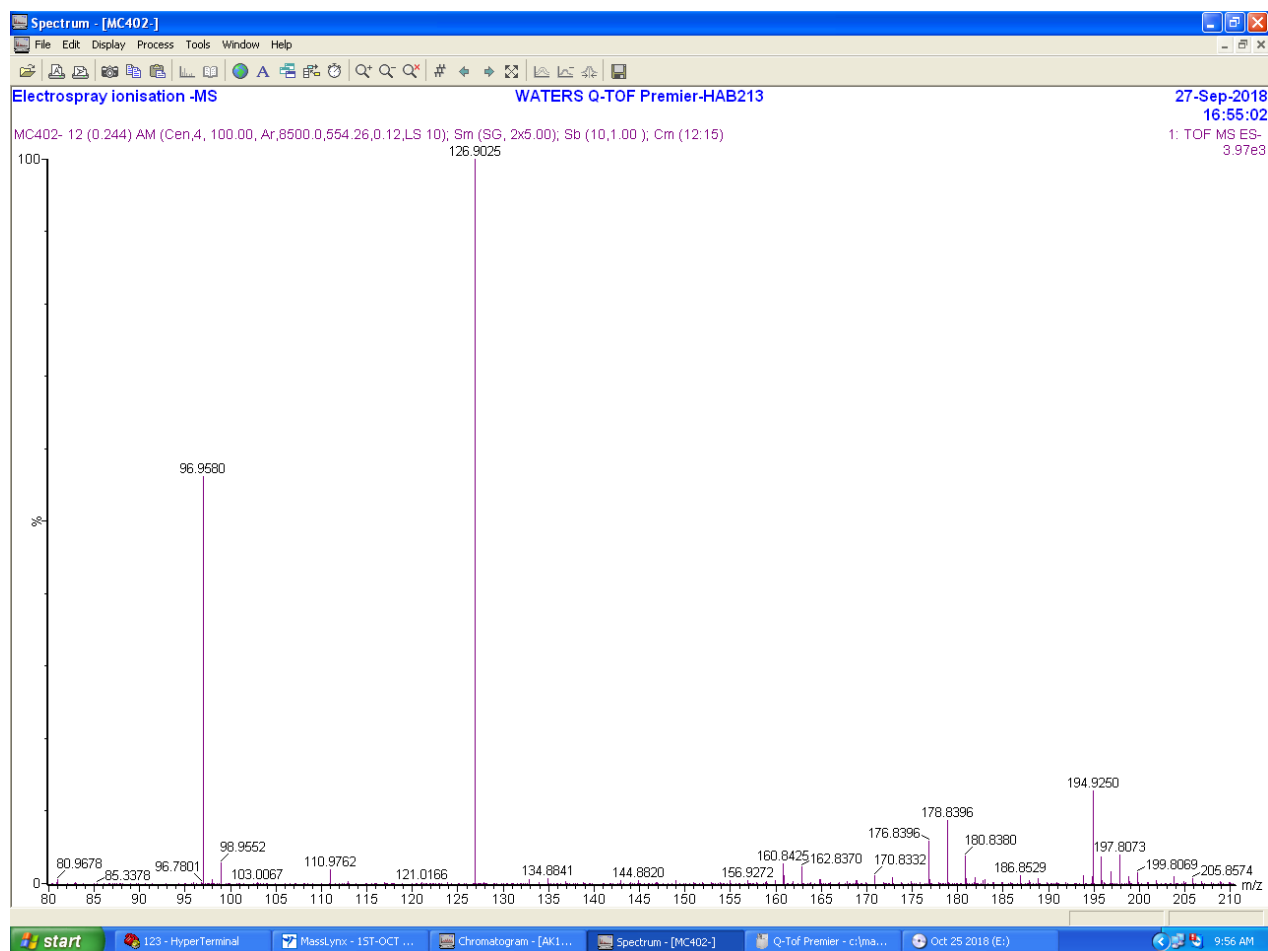

| Observed envelope | Observed for                   | Calculated $m/z$ |
|-------------------|--------------------------------|------------------|
| 96.9580           | $\text{HSO}_4^-$               | 96.9596          |
| 194.9250          | $[\text{H}(\text{HSO}_4)_2]^-$ | 194.9269         |



Figure S 33. ESI-MS of the solution containing [L-H] and 2 equivalent ferrocene after purging SO<sub>2</sub> (Positive ion mode) in CH<sub>3</sub>CN

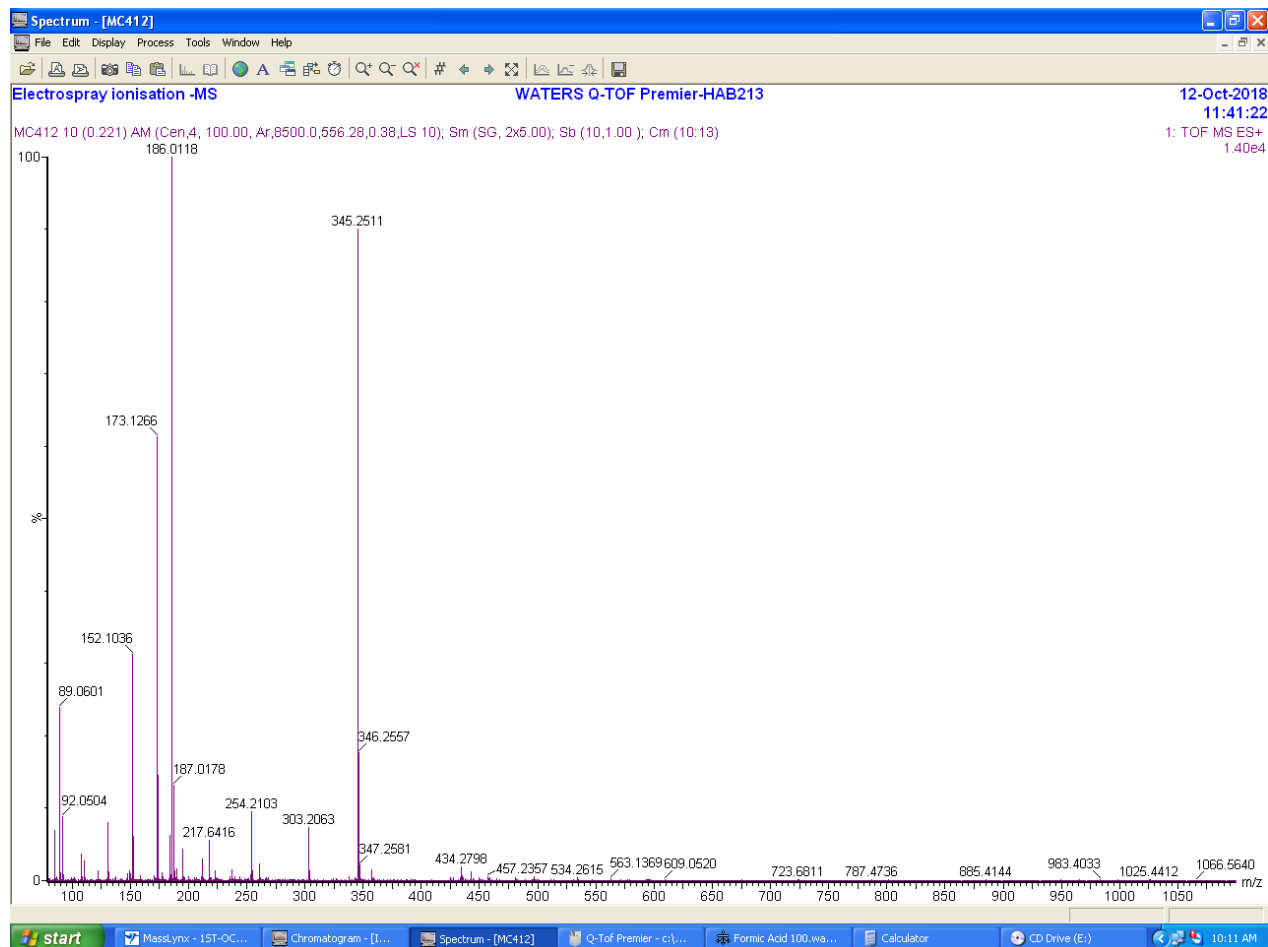

| Observed envelope | Observed for    | Calculated $m/z$ |
|-------------------|-----------------|------------------|
| 173.1266          |                 | 173.1296         |
| 186.0118          | Ferrocenium ion | 186.0132         |
| 345.2511          |                 | 345.2515         |

Figure S 34. ESI-MS of the solution containing [L-H] and 2 equivalent ferrocene after purging SO<sub>2</sub> (Negative ion mode) in CH<sub>3</sub>CN

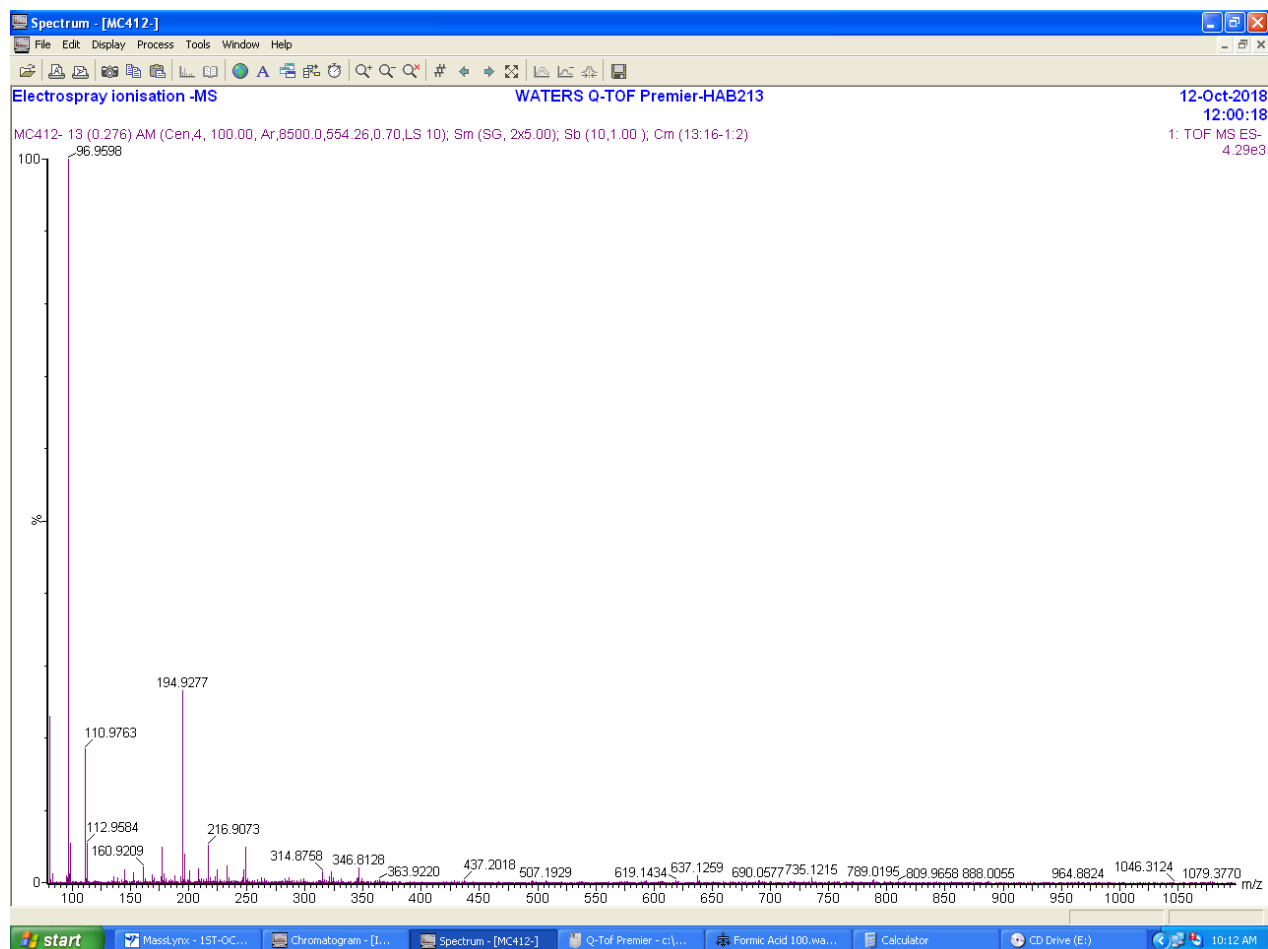

| Observed envelope | Observed for                   | Calculated $m/z$ |
|-------------------|--------------------------------|------------------|
| 96.9598           | $\text{HSO}_4^-$               | 96.9596          |
| 194.9277          | $[\text{H}(\text{HSO}_4)_2]^-$ | 194.9269         |

Figure S 35. UV-Vis of ferrocene in acetonitrile and in SO<sub>2</sub>-purged acetonitrile.

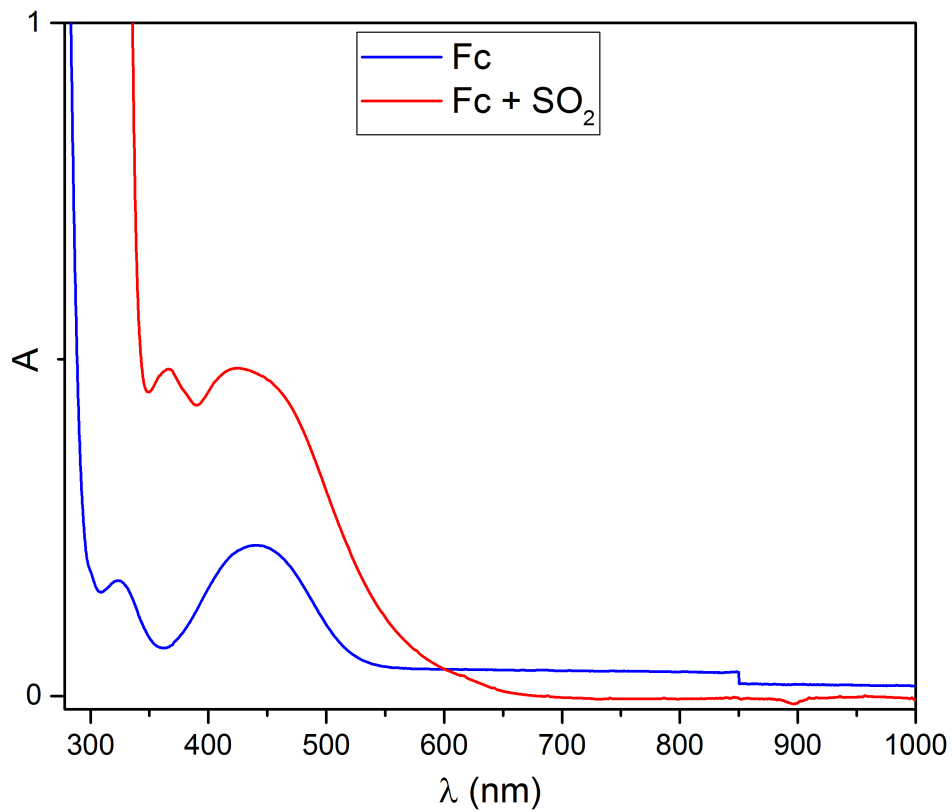

**Blue line:** Ferrocene solution in acetonitrile (323nm and 445 nm)

**Red line:** After purging SO<sub>2</sub>; change in absorbance is due to solvent evaporation

Figure S 36. CV of [Cu(L-H)Cl<sub>2</sub>] in acetonitrile.

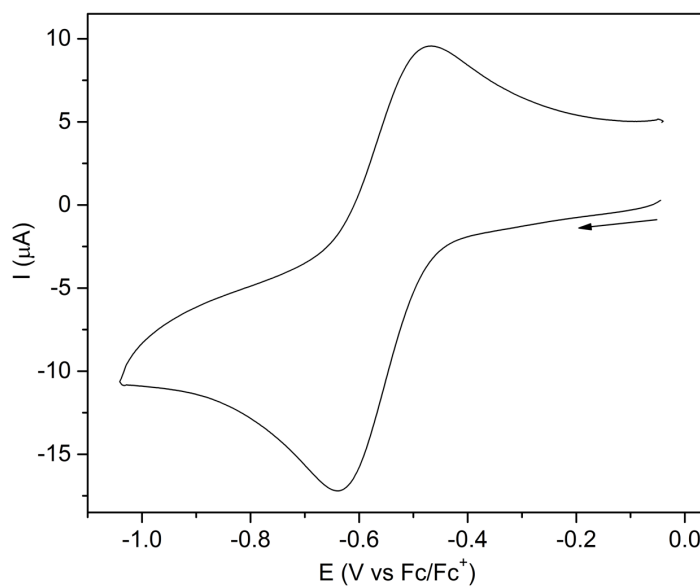

Cyclic voltammogram of 1mM acetonitrile solution of [Cu(L-H)Cl<sub>2</sub>] containing 0.1 M Bu<sub>4</sub>NPF<sub>6</sub> recorded on a static glassy carbon disc working electrode with a Pt wire auxiliary electrode and Ag/AgCl reference electrode (with internal ferrocene) at 25 °C with a scan rate of 200 mV s<sup>-1</sup>;  $E_{pc} = -0.64$  V;  $E_{pa} = -0.45$  V vs Fc<sup>0/+</sup>

Table S 1. Crystal data for [Cu(L-OMe)Cl<sub>2</sub>]

|                                   |                                                                      |                              |
|-----------------------------------|----------------------------------------------------------------------|------------------------------|
| Identification code               | CCDC-1454816                                                         |                              |
| Empirical formula                 | C <sub>26</sub> H <sub>36</sub> Cl <sub>2</sub> Cu N <sub>10</sub> O |                              |
| Formula weight                    | 639.09                                                               |                              |
| Temperature                       | 100(2) K                                                             |                              |
| Wavelength                        | 0.71073 Å                                                            |                              |
| Crystal system                    | Monoclinic                                                           |                              |
| Space group                       | C 2/c                                                                |                              |
| Unit cell dimensions              | a = 27.313(8) Å                                                      | $\alpha = 90^\circ$ .        |
|                                   | b = 9.409(3) Å                                                       | $\beta = 107.956(4)^\circ$ . |
|                                   | c = 24.649(7) Å                                                      | $\gamma = 90^\circ$ .        |
| Volume                            | 6026(3) Å <sup>3</sup>                                               |                              |
| Z                                 | 8                                                                    |                              |
| Density (calculated)              | 1.409 Mg/m <sup>3</sup>                                              |                              |
| Absorption coefficient            | 0.941 mm <sup>-1</sup>                                               |                              |
| F(000)                            | 2664                                                                 |                              |
| Crystal size                      | 0.25 x 0.17 x 0.11 mm <sup>3</sup>                                   |                              |
| Theta range for data collection   | 1.567 to 28.431°.                                                    |                              |
| Index ranges                      | -36 ≤ h ≤ 27, -12 ≤ k ≤ 11, -29 ≤ l ≤ 32                             |                              |
| Reflections collected             | 18469                                                                |                              |
| Independent reflections           | 7153 [R(int) = 0.0605]                                               |                              |
| Completeness to theta = 25.500°   | 99.5 %                                                               |                              |
| Absorption correction             | Semi-empirical from equivalents                                      |                              |
| Max. and min. transmission        | 0.856 and 0.768                                                      |                              |
| Refinement method                 | Full-matrix least-squares on F <sup>2</sup>                          |                              |
| Data / restraints / parameters    | 7153 / 51 / 393                                                      |                              |
| Goodness-of-fit on F <sup>2</sup> | 1.060                                                                |                              |
| Final R indices [I > 2σ(I)]       | R1 = 0.0595, wR2 = 0.1358                                            |                              |
| R indices (all data)              | R1 = 0.1146, wR2 = 0.1876                                            |                              |
| Largest diff. peak and hole       | 0.917 and -0.853 e.Å <sup>-3</sup>                                   |                              |

Table S 2. Crystal data for [Cu(Tim-H)(H<sub>2</sub>O)Cl<sub>2</sub>](OTf)

|                                   |                                                                                                  |                            |
|-----------------------------------|--------------------------------------------------------------------------------------------------|----------------------------|
| Identification code               | CCDC-1895745                                                                                     |                            |
| Empirical formula                 | C <sub>18</sub> H <sub>31</sub> Cl <sub>2</sub> CuF <sub>3</sub> N <sub>8</sub> O <sub>5</sub> S |                            |
| Formula weight                    | 663.01                                                                                           |                            |
| Temperature                       | 100 K                                                                                            |                            |
| Wavelength                        | 0.71073 Å                                                                                        |                            |
| Crystal system                    | Monoclinic                                                                                       |                            |
| Space group                       | P2 <sub>1</sub> /n                                                                               |                            |
| Unit cell dimensions              | a = 14.9180(10) Å                                                                                | $\alpha = 90^\circ$        |
|                                   | b = 11.9455(8) Å                                                                                 | $\beta = 110.940(2)^\circ$ |
|                                   | c = 16.2476(11) Å                                                                                | $\gamma = 90^\circ$        |
| Volume                            | 2704.1(3) Å <sup>3</sup>                                                                         |                            |
| Z                                 | 4                                                                                                |                            |
| Density (calculated)              | 1.629 g/cm <sup>3</sup>                                                                          |                            |
| Absorption coefficient            | 1.149 mm <sup>-1</sup>                                                                           |                            |
| F(000)                            | 1364.0                                                                                           |                            |
| Crystal size                      | 0.22 × 0.2 × 0.18 mm <sup>3</sup>                                                                |                            |
| Theta range for data collection   | 4.34 to 56.586                                                                                   |                            |
| Index ranges                      | -19 ≤ h ≤ 19, -15 ≤ k ≤ 15, -21 ≤ l ≤ 21                                                         |                            |
| Reflections collected             | 41974                                                                                            |                            |
| Independent reflections           | 6713 [R <sub>int</sub> = 0.0654, R <sub>sigma</sub> = 0.0435]                                    |                            |
| Completeness to theta = 28.293°   | 100 %                                                                                            |                            |
| Absorption correction             | multi-scan                                                                                       |                            |
| Max. and min. transmission        | 0.746 and 0.701                                                                                  |                            |
| Data / restraints / parameters    | 6713/0/358                                                                                       |                            |
| Goodness-of-fit on F <sup>2</sup> | 1.123                                                                                            |                            |
| Final R indices [I > 2sigma(I)]   | R <sub>1</sub> = 0.0471, wR <sub>2</sub> = 0.1280                                                |                            |
| R indices (all data)              | R <sub>1</sub> = 0.0742, wR <sub>2</sub> = 0.1610                                                |                            |
| Largest diff. peak and hole       | 1.06 and -1.02 e.Å <sup>-3</sup>                                                                 |                            |

Table S 3. Crystal data for [L-H]

|                                   |                                                               |                     |
|-----------------------------------|---------------------------------------------------------------|---------------------|
| Identification code               | CCDC-1895746                                                  |                     |
| Empirical formula                 | C <sub>23</sub> H <sub>31</sub> N <sub>9</sub>                |                     |
| Formula weight                    | 433.57                                                        |                     |
| Temperature                       | 100 K                                                         |                     |
| Wavelength                        | 0.71073 Å                                                     |                     |
| Crystal system                    | Orthorhombic                                                  |                     |
| Space group                       | Iba2                                                          |                     |
| Unit cell dimensions              | a = 21.678(2) Å                                               | $\alpha = 90^\circ$ |
|                                   | b = 11.7948(13) Å                                             | $\beta = 90^\circ$  |
|                                   | c = 17.695(3) Å                                               | $\gamma = 90^\circ$ |
| Volume                            | 4524.4(10) Å <sup>3</sup>                                     |                     |
| Z                                 | 8                                                             |                     |
| Density (calculated)              | 1.273 g/cm <sup>3</sup>                                       |                     |
| Absorption coefficient            | 0.081 mm <sup>-1</sup>                                        |                     |
| F(000)                            | 1856.0                                                        |                     |
| Crystal size                      | 0.08 × 0.06 × 0.05 mm <sup>3</sup>                            |                     |
| Theta range for data collection   | 5.944 to 50.246                                               |                     |
| Index ranges                      | -25 ≤ h ≤ 25, -14 ≤ k ≤ 14, -21 ≤ l ≤ 21                      |                     |
| Reflections collected             | 25154                                                         |                     |
| Independent reflections           | 4016 [R <sub>int</sub> = 0.0762, R <sub>sigma</sub> = 0.0495] |                     |
| Completeness to theta = 25.123°   | 100 %                                                         |                     |
| Absorption correction             | multi-scan                                                    |                     |
| Max. and min. transmission        | 0.746 and 0.569                                               |                     |
| Data / restraints / parameters    | 4016/7/314                                                    |                     |
| Goodness-of-fit on F <sup>2</sup> | 1.098                                                         |                     |
| Final R indices [I > 2sigma(I)]   | R <sub>1</sub> = 0.0469, wR <sub>2</sub> = 0.1038             |                     |
| R indices (all data)              | R <sub>1</sub> = 0.0604, wR <sub>2</sub> = 0.1129             |                     |
| Largest diff. peak and hole       | 0.22 and -0.22 e. Å <sup>-3</sup>                             |                     |

Table S 4. Crystal data for [Cu(L-H)Cl<sub>2</sub>]

|                                   |                                                                                 |                             |
|-----------------------------------|---------------------------------------------------------------------------------|-----------------------------|
| Identification code               | CCDC-1895747                                                                    |                             |
| Empirical formula                 | C <sub>25</sub> H <sub>39</sub> Cl <sub>2</sub> CuN <sub>9</sub> O <sub>2</sub> |                             |
| Formula weight                    | 632.09                                                                          |                             |
| Temperature                       | 100 K                                                                           |                             |
| Wavelength                        | 0.71073 Å                                                                       |                             |
| Crystal system                    | Monoclinic                                                                      |                             |
| Space group                       | P2 <sub>1</sub> /n                                                              |                             |
| Unit cell dimensions              | a = 8.1817(3) Å                                                                 | $\alpha = 90^\circ$         |
|                                   | b = 15.7088(7) Å                                                                | $\beta = 95.9210(10)^\circ$ |
|                                   | c = 24.5591(11) Å                                                               | $\gamma = 90^\circ$         |
| Volume                            | 3139.6(2) Å <sup>3</sup>                                                        |                             |
| Z                                 | 4                                                                               |                             |
| Density (calculated)              | 1.337 g/cm <sup>3</sup>                                                         |                             |
| Absorption coefficient            | 0.903 mm <sup>-1</sup>                                                          |                             |
| F(000)                            | 1324.0                                                                          |                             |
| Crystal size                      | 0.2 × 0.18 × 0.16 mm <sup>3</sup>                                               |                             |
| Theta range for data collection   | 4.224 to 56.542                                                                 |                             |
| Index ranges                      | -10 ≤ h ≤ 10, -20 ≤ k ≤ 20, -32 ≤ l ≤ 32                                        |                             |
| Reflections collected             | 48948                                                                           |                             |
| Independent reflections           | 7778 [R <sub>int</sub> = 0.0631, R <sub>sigma</sub> = 0.0430]                   |                             |
| Completeness to theta = 28.271°   | 99.9 %                                                                          |                             |
| Absorption correction             | Multi-scan                                                                      |                             |
| Max. and min. transmission        | 0.746 and 0.690                                                                 |                             |
| Data / restraints / parameters    | 7778/0/360                                                                      |                             |
| Goodness-of-fit on F <sup>2</sup> | 1.055                                                                           |                             |
| Final R indices [I > 2sigma(I)]   | R <sub>1</sub> = 0.0486, wR <sub>2</sub> = 0.1375                               |                             |
| R indices (all data)              | R <sub>1</sub> = 0.0667, wR <sub>2</sub> = 0.1548                               |                             |
| Largest diff. peak and hole       | 0.59 and -0.82 e. Å <sup>-3</sup>                                               |                             |



Table S 5. Crystal data for [Cu(L-H)(H<sup>+</sup>)(OTf)Cl](OTf)

|                                   |                                                                                                 |                             |
|-----------------------------------|-------------------------------------------------------------------------------------------------|-----------------------------|
| Identification code               | CCDC-1895748                                                                                    |                             |
| Empirical formula                 | C <sub>25</sub> H <sub>32</sub> ClCuF <sub>6</sub> N <sub>9</sub> O <sub>6</sub> S <sub>2</sub> |                             |
| Formula weight                    | 831.70                                                                                          |                             |
| Temperature                       | 100 K                                                                                           |                             |
| Wavelength                        | 0.71073 Å                                                                                       |                             |
| Crystal system                    | triclinic                                                                                       |                             |
| Space group                       | P-1                                                                                             |                             |
| Unit cell dimensions              | a = 8.4954(8)Å                                                                                  | $\alpha = 100.763(2)^\circ$ |
|                                   | b = 11.7314(11)Å                                                                                | $\beta = 99.350(2)^\circ$   |
|                                   | c = 19.2810(18)Å                                                                                | $\gamma = 108.877(2)^\circ$ |
| Volume                            | 1734.2(3)Å <sup>3</sup>                                                                         |                             |
| Z                                 | 2                                                                                               |                             |
| Density (calculated)              | 1.593g/cm <sup>3</sup>                                                                          |                             |
| Absorption coefficient            | 0.912 mm <sup>-1</sup>                                                                          |                             |
| F(000)                            | 850.0                                                                                           |                             |
| Crystal size                      | 0.24 × 0.22 × 0.2 mm <sup>3</sup>                                                               |                             |
| Theta range for data collection   | 4.43 to 56.676                                                                                  |                             |
| Index ranges                      | -11 ≤ h ≤ 11, -15 ≤ k ≤ 15, -25 ≤ l ≤ 25                                                        |                             |
| Reflections collected             | 21482                                                                                           |                             |
| Independent reflections           | 8622 [R <sub>int</sub> = 0.0452, R <sub>sigma</sub> = 0.0680]                                   |                             |
| Completeness to theta = 28.338°   | 99.6 %                                                                                          |                             |
| Absorption correction             | multi-scan                                                                                      |                             |
| Max. and min. transmission        | 0.746 and 0.679                                                                                 |                             |
| Data / restraints / parameters    | 8622/43/455                                                                                     |                             |
| Goodness-of-fit on F <sup>2</sup> | 1.053                                                                                           |                             |
| Final R indices [I > 2sigma(I)]   | R <sub>1</sub> = 0.0819, wR <sub>2</sub> = 0.2246                                               |                             |
| R indices (all data)              | R <sub>1</sub> = 0.1196, wR <sub>2</sub> = 0.2612                                               |                             |
| Largest diff. peak and hole       | 1.59 and -1.19 e.Å <sup>-3</sup>                                                                |                             |

## Reference

- (1) Mehrotra, S.; Raje, S.; Jain, A. K.; Jain, A.; Kandasamy, P.; Butcher, R. J.; Angamuthu, R. *ChemistrySelect* **2018**, 3, 4844.
